# Supplementary material for: Assessment of optimized FRET substrates as universal corona- and picornavirus main protease substrates for screening assays
Source: Royal Society of Chemistry journal article supplement (doi:10.1039/d4ra06573e), 2024-01-01
Supplement: d4ra06573e1.pdf [file d4ra06573e1.pdf]

## Supplemental information

### Assessment of optimized FRET substrates as universal corona- and picornavirus main protease substrates for screening assays

Conrad Fischer,<sup>a</sup> Tayla J. Van Oers,<sup>a</sup> Marco J. van Belkum,<sup>a</sup> Tess Lamer,<sup>a</sup> Aaron Romney,<sup>a</sup> Pu Chen,<sup>b</sup> M. Joanne Lemieux<sup>b</sup> and John C. Vederas<sup>a,\*</sup>

<sup>a</sup> Department of Chemistry, University of Alberta, Edmonton AB, T6G 2G2, Canada

<sup>b</sup> Department of Biochemistry, Membrane Protein Disease Research Group, University of Alberta, Edmonton AB, T6G 2R3, Canada

\* correspondence author email: john.vederas@ualberta.ca

|                                                                                                                  |    |
|------------------------------------------------------------------------------------------------------------------|----|
| Sequence comparison of M <sup>pro</sup> s from investigated coronaviruses                                        |    |
| <b>Figure S1.</b> Sequence alignment of coronavirus main proteases under investigation.....                      | 2  |
| Sequence comparison of M <sup>pro</sup> s from investigated picornaviruses                                       |    |
| <b>Figure S2.</b> Sequence alignment of picornavirus main proteases under investigation.....                     | 3  |
| Chromatographic and mass spectroscopic data and purity of synthesized FRET substrates                            |    |
| <b>Figure S3.</b> LCMS data for <b>Blanchard</b> substrate.....                                                  | 4  |
| <b>Figure S4.</b> LCMS data for <b>Blanchard-VV</b> substrate.....                                               | 4  |
| <b>Figure S5.</b> LCMS data for <b>PEDV 1</b> substrate.....                                                     | 5  |
| <b>Figure S6.</b> LCMS data for <b>PEDV 2</b> substrate.....                                                     | 5  |
| <b>Figure S7.</b> LCMS data for <b>PEDV 3</b> substrate.....                                                     | 6  |
| <b>Figure S8.</b> LCMS data for <b>PEDV 4</b> substrate.....                                                     | 6  |
| <b>Figure S9.</b> LCMS data for (-) FRET substrate (neg. control).....                                           | 7  |
| <b>Figure S10.</b> LCMS data for <b>HRVFRET</b> substrate.....                                                   | 7  |
| <b>Figure S11.</b> LCMS data for <b>PVFRET</b> substrate.....                                                    | 8  |
| <b>Figure S12.</b> LCMS data for <b>EV71FRET</b> substrate.....                                                  | 8  |
| <b>Figure S13.</b> LCMS data for <b>NVFRET</b> substrate.....                                                    | 9  |
| <b>Figure S14.</b> LCMS data for <b>NPFRET</b> substrate.....                                                    | 9  |
| Gel filtration and LCMS data of purified tag-free main proteases                                                 |    |
| <b>Figure S15.</b> Chromatographic and ESI mass-spectrometric characterization of FIPV-M <sup>pro</sup> .....    | 10 |
| <b>Figure S16.</b> Chromatographic and ESI mass-spectrometric characterization of PEDV-M <sup>pro</sup> .....    | 11 |
| <b>Figure S17.</b> Chromatographic and ESI mass-spectrometric characterization of EqCoV-M <sup>pro</sup> .....   | 12 |
| <b>Figure S18.</b> Chromatographic and ESI mass-spectrometric characterization of HRV-M <sup>pro</sup> .....     | 13 |
| <b>Figure S19.</b> Chromatographic and ESI mass-spectrometric characterization of PV-M <sup>pro</sup> .....      | 14 |
| <b>Figure S20.</b> Chromatographic and ESI mass-spectrometric characterization of EV71-M <sup>pro</sup> .....    | 15 |
| <b>Figure S21.</b> Chromatographic and ESI mass-spectrometric characterization of NV-M <sup>pro</sup> .....      | 16 |
| Kinetic data of FRET substrates for coronavirus M <sup>pro</sup> s                                               |    |
| <b>Figure S22.</b> Reaction progression curves of various M <sup>pro</sup> s with selected FRET substrates.....  | 17 |
| <b>Figure S23.</b> LCMS data of SARS-CoV-2 M <sup>pro</sup> cleavage products with selected FRET substrates..... | 18 |
| <b>Figure S24.</b> Michaelis-Menten plot of various coronavirus FRETs with SARS-CoV-2 M <sup>pro</sup> .....     | 19 |
| <b>Figure S25.</b> Michaelis-Menten plot of various coronavirus FRETs with FIPV M <sup>pro</sup> .....           | 19 |
| <b>Figure S26.</b> Michaelis-Menten plot of various coronavirus FRETs with PEDV M <sup>pro</sup> .....           | 20 |
| <b>Figure S27.</b> Michaelis-Menten plot of various PEDV FRETs with PEDV M <sup>pro</sup> .....                  | 20 |
| <b>Figure S28.</b> Michaelis-Menten plot of various coronavirus FRETs with EqCoV M <sup>pro</sup> .....          | 21 |
| Kinetic data of FRET substrates for picornavirus M <sup>pro</sup> s                                              |    |
| <b>Figure S29.</b> Michaelis-Menten plot of various picornavirus FRETs with HRV M <sup>pro</sup> .....           | 21 |
| <b>Figure S30.</b> Michaelis-Menten plot of various coronavirus FRETs with PV M <sup>pro</sup> .....             | 22 |
| <b>Figure S31.</b> Michaelis-Menten plot of various coronavirus FRETs with EV71 M <sup>pro</sup> .....           | 22 |
| <b>Figure S32.</b> Michaelis-Menten plot of various coronavirus FRETs with NV M <sup>pro</sup> .....             | 23 |
| Z' assay for PEDV3 for various coronavirus M <sup>pro</sup> s                                                    |    |
| <b>Figure S33.</b> Z' assay quality statistics for different coronaviral M <sup>pro</sup> s.....                 | 24 |

|            |                                                               |     |
|------------|---------------------------------------------------------------|-----|
| FIPV       | SGLRKMAQPSGVVEPCIVRVAYGNNVLNGLWLGDEVICPRHVIASDTS-RVINYENELSS  | 59  |
| PEDV       | AGLRKMAQPSGVVEKCIVRVCYGNMALNGLWLGDTVMCPRHVIASSTT-STIDYDIALSV  | 59  |
| SARS-CoV-2 | SGFRKMAFPSPGKVEGCMVQVTCGTTTTLNGLWLDVVYCPRHVICTSEDMLNPNYEDLLIR | 60  |
| EqCoV      | SGIVKMNPTSKVEPCIVSVTYGNMTLNGLWLDKVCPRHVICSASDMTNPDYTNLLCR     | 60  |
|            | :*: **: *:. ** *:* * * . *****.* * *****.: :* *               |     |
| FIPV       | VRLHNFSIAKNNVFLGVVSAKYKGVNLVLKVNQVNPNTPEHKFKSVRPGESFNILACYEG  | 119 |
| PEDV       | LRLHNFSISSGNVFLGVVGTMRGALLQIKVNQNNVHTPKYTYRTVVRPGESFNILACYDG  | 119 |
| SARS-CoV-2 | KSNHNFLVQAGNVQLRVIGHSMQNCVCLKKVDTANPKTPKYKFVRIQPGQTFVSLACYNG  | 120 |
| EqCoV      | VTSSDFTVLFDRLSLTVMSYQMQCMLVLTVTLQNSRTPKYTFGVVKGGETFTVLAAYNG   | 120 |
|            | :* : ..: * *:. :. * :.* * .***:..: :***:*.***.*:*             |     |
| FIPV       | CPGSVYGVNMRSQGTIKGSFIAGTCGSVGYVLENGTLYFVYMHHLGNGSHVGSNLEGE    | 179 |
| PEDV       | AAAGVYGVNMRSNYTIRGSFINGACGSPGYNINNGTVEFCYLHQLELGSGCHVGSDDLGV  | 179 |
| SARS-CoV-2 | SPSGVYQCAMRPNFTIKGSFLNGSCGSGVFNIDYDCVSFCYMHMELPTGVHAGTDLEGN   | 180 |
| EqCoV      | KPQGAFHVTMRSSYTIKGSFLCGSCGSGVGYVLMGDCVKFVYMHQLELSTGCHTGTDFNGD | 180 |
|            | ..: ** . ***:***: *:*:* * : . : * *:*:*:* * *.*:***:*         |     |
| FIPV       | MYGGYEDQPSMQLEGTNVMSDDNVVAFLYAALINGERWVFTNTSMTLESYNSWAKTNSFT  | 239 |
| PEDV       | MYGGYEDQPTLQVEGASSLFTENVLAFLYAALINGSTWWLSSSRIAVDRFNEWAVHNGMT  | 239 |
| SARS-CoV-2 | FYGPVDRQTAQAAGTDTTITVNVLAFLYAALINGDRWFLNRFTTTLNDFNLVAMKYNYE   | 240 |
| EqCoV      | FYGPYKDAQVVQLPVQDYIQSVNFVAWLYAAI LNNCNWFVQSDKCSVEDFNVWALSNGFS | 240 |
|            | :** : * * . : *.:*:*:*:*:*.* *:. :..: :* * .                  |     |
| FIPV       | EIVST--DAFNMLAAKTGYSVEKLLCCI-VRLNKGGFGRTILSYGSLCDEFTPIEVIRQM  | 296 |
| PEDV       | TVVNT--DCFSILAAGTGVQVRLASI-QSLHKNFGGKQILGYTSLTDEFTTGEVIRQM    | 296 |
| SARS-CoV-2 | PLTQDHVDILGPLSAQTGIAVLDMCASLKELLQNGMNGRTILGSALLEDEFTPFDDVVRQC | 300 |
| EqCoV      | QVKSDLV--IDALASMTGVSLETLLAAI-KRLKNGFQGRQIMGSCSFEDELTPSDVYQQL  | 297 |
|            | : . :. *:. ** : : :. *:.:. *:* *:. : **:* :* :*               |     |
| FIPV       | YGVNLQ                                                        | 302 |
| PEDV       | YGVNLQ                                                        | 302 |
| SARS-CoV-2 | SGVTFQ                                                        | 306 |
| EqCoV      | AGIKLQ                                                        | 303 |
|            | *:..:*                                                        |     |

**Figure S1.** Sequence alignment of coronavirus main proteases under investigation. The catalytic dyad (His41, Cys145) is highlighted in green, conserved sub-pocket residues (S1', S1 and S2) important for substrate recognition are highlighted in light grey.

|      |                                                               |     |
|------|---------------------------------------------------------------|-----|
| NV   | APPTLWSRVTKFGSGWGFWS-----PTVFITTTTHVVPTGVKE                   | 38  |
| HRV  | -----GPNTEFALSLLRKNIMTITTSKGEFTGLGIHDRVCVIPTHAQPGDDVL         | 48  |
| PV   | -----GPGFDYAVAMAKRNIVTATTSKGEFTMLGVHDNVAILPTHASPGESIV         | 48  |
| EV71 | -----GPSLDFALSLLRRNIRQAQTDQGHFTMLGVRDRLAILPRHSQPGKTIW         | 48  |
|      | * . : :: : : : * *                                            |     |
|      |                                                               |     |
| NV   | FFGE-----PLSSIAIHQAGEFTQFRFSKKMRP-DLTGMVLEEGCPE               | 79  |
| HRV  | VNGQKIRVKDKYKLVDPENINLELTVLTLDRNEK---FRDIRGFISEDLE-----       | 95  |
| PV   | IDGKEVEILDAKALEDQAGTNLEITIIITLKRNEK---FRDIRPHIPTQIT-----      | 95  |
| EV71 | VEHKLINVLDARELVDEQGVNLELTVLTLDTNEK---FRDITKFIPEVIT-----       | 95  |
|      | . : : : : : : ** :                                            |     |
|      |                                                               |     |
| NV   | GTVCSVLIKRDSEGELLPLAVRMGAIASMRIQGRLVHGQSGMLLTGA---NAKGMDLGTIP | 136 |
| HRV  | G-VDATLVVH-SNNFTNTILEVGPVTM---AGL-----INLSSTPTNRMIRYDYATKT    | 143 |
| PV   | ETNDGVLIVN-TSKYPNMYVPVGAVTE---QGY-----LNLGGRQTARTLMYNFPTRA    | 144 |
| EV71 | GASDATLVIN-TEHMPSMFVPGDVVQ---YGF-----LNLGKPTHRTMMYNFPTKA      | 144 |
|      | ..* : . : . : : * : * . . : *                                 |     |
|      |                                                               |     |
| NV   | GDCGAPYVHKRGNDWVVCVHAAATKSGNTVVCAVQAGEGETALE-----             | 181 |
| HRV  | GQCGGVLCATG----KIFGIHV-----GGNGRQGFSAQLKKQYFVEKQ              | 182 |
| PV   | GQCGGVITCTG----KVIGMHV-----GGNGSHGFAAALKRSYFTQSQ              | 183 |
| EV71 | GQCGGVVTSVG----KIIGIHI-----GGNGRQGFCAGLKRSYFASEQ              | 183 |
|      | *:* : : * : * . * : *                                         |     |

**Figure S2.** Sequence alignment of picornavirus and norovirus main proteases under investigation. The catalytic triad (His41, Cys147) is highlighted in green, conserved sub-pocket residues (S1', S1 and S2) important for substrate recognition are highlighted in light grey.

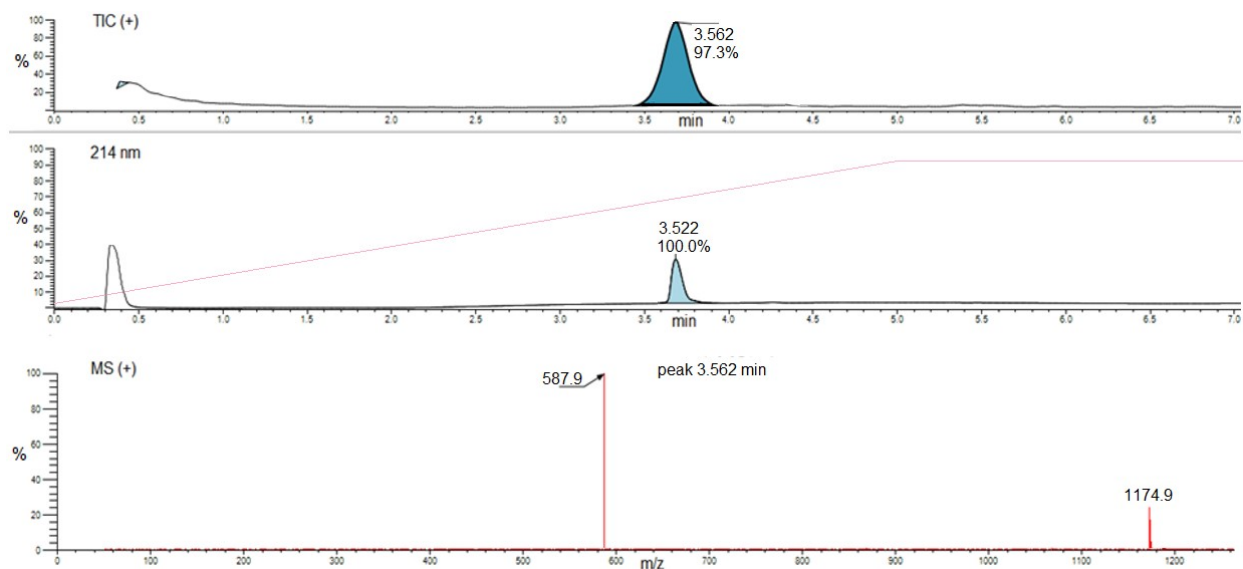

**Figure S3.** Total ion count chromatogram (TIC+) and mass spectral data for compound **Blanchard** after cleavage of the assembled peptide from SPPS resin and HPLC purification. The solvent gradient (%B = acetonitrile) is highlighted in pink in the DAD chromatogram at 214nm.

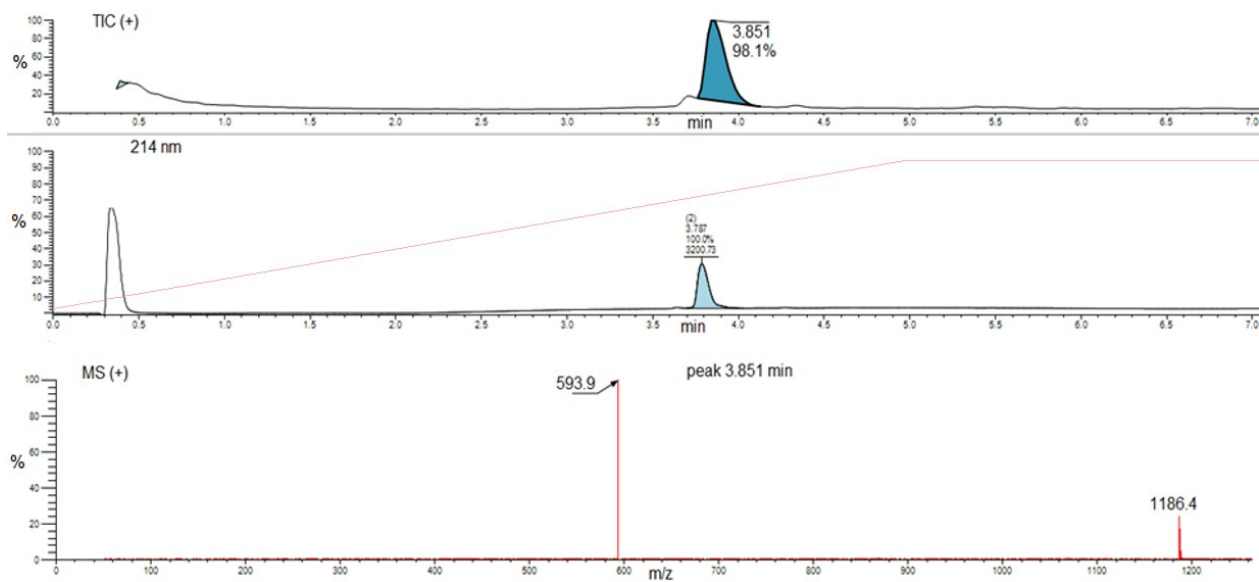

**Figure S4.** Total ion count chromatogram (TIC+) and mass spectral data for compound **Blanchard-VV** after cleavage of the assembled peptide from SPPS resin and HPLC purification. The solvent gradient (%B = acetonitrile) is highlighted in pink in the DAD chromatogram at 214nm.

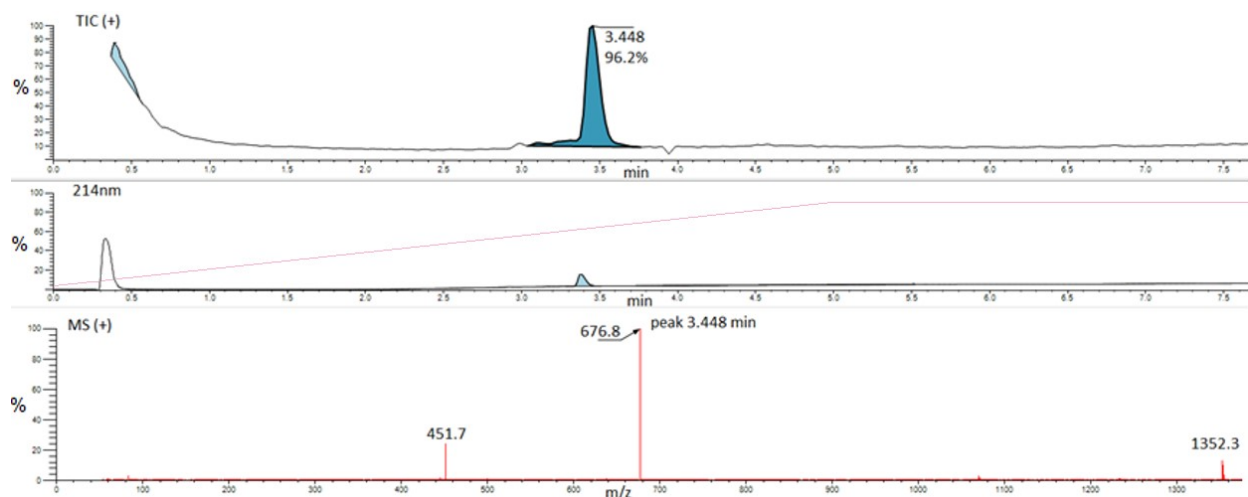

**Figure S5.** Total ion count chromatogram (TIC+) and mass spectral data for compound **PEDV 1** after cleavage of the assembled peptide from SPPS resin and HPLC purification. The solvent gradient (%B = acetonitrile) is highlighted in pink in the DAD chromatogram at 214nm.

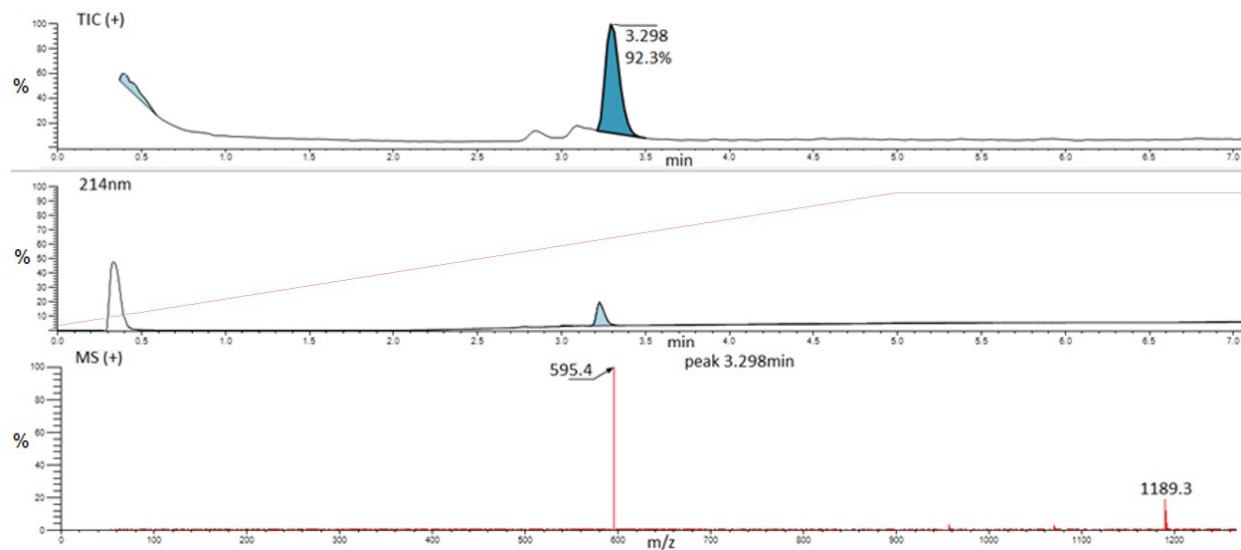

**Figure S6.** Total ion count chromatogram (TIC+) and mass spectral data for compound **PEDV 2** after cleavage of the assembled peptide from SPPS resin and HPLC purification. The solvent gradient (%B = acetonitrile) is highlighted in pink in the DAD chromatogram at 214nm.

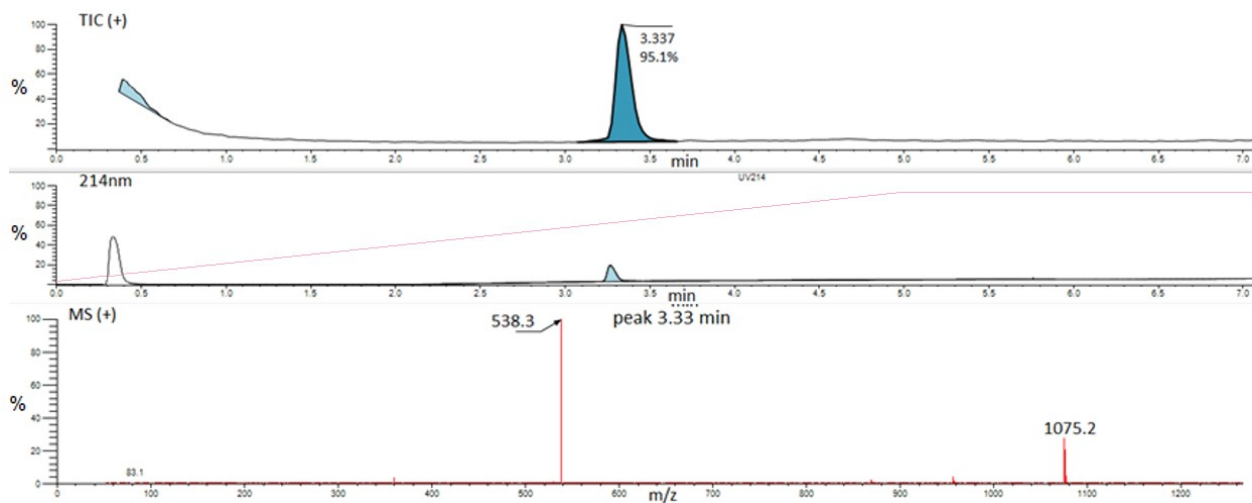

**Figure S7.** Total ion count chromatogram (TIC+) and mass spectral data for compound **PEDV 3** after cleavage of the assembled peptide from SPPS resin and HPLC purification. The solvent gradient (%B = acetonitrile) is highlighted in pink in the DAD chromatogram at 214nm.

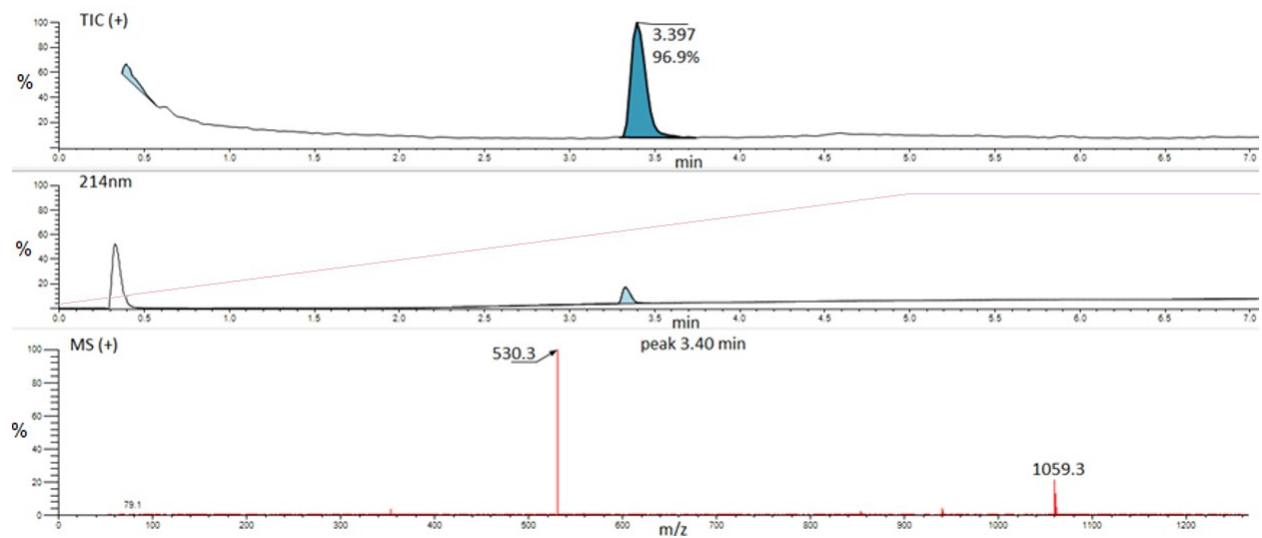

**Figure S8.** Total ion count chromatogram (TIC+) and mass spectral data for compound **PEDV 4** after cleavage of the assembled peptide from SPPS resin and HPLC purification. The solvent gradient (%B = acetonitrile) is highlighted in pink in the DAD chromatogram at 214nm.

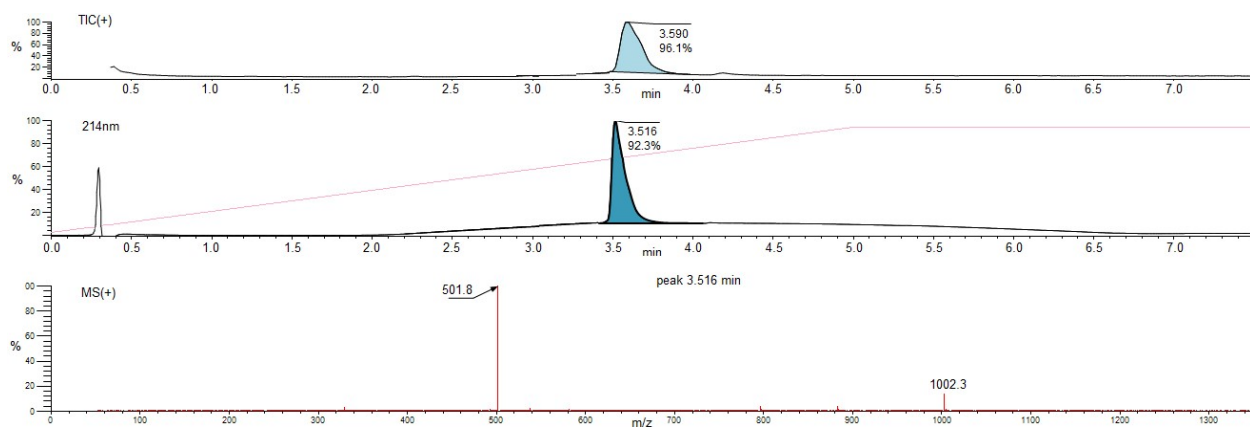

**Figure S9.** Total ion count chromatogram (TIC+) and mass spectral data for compound **(-)FRET** (negative control) after cleavage of the assembled peptide from SPPS resin and HPLC purification. The solvent gradient (%B = acetonitrile) is highlighted in pink in the DAD chromatogram at 214nm.

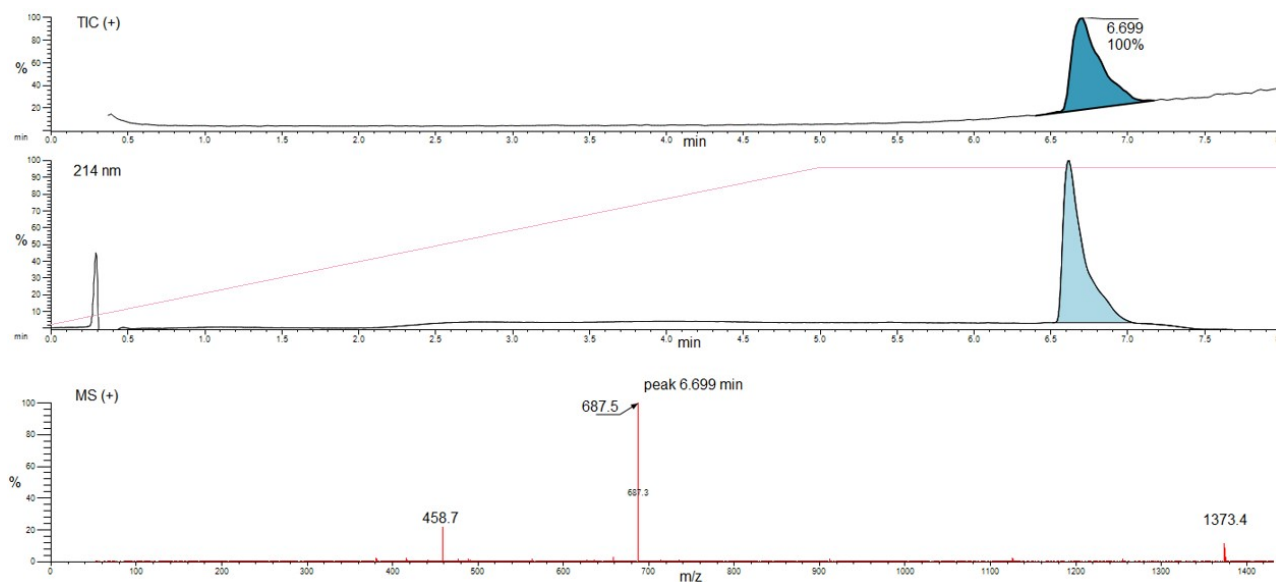

**Figure S10.** Total ion count chromatogram (TIC+) and mass spectral data for compound **HRVFRET** after cleavage of the assembled peptide from SPPS resin and HPLC purification. The solvent gradient (%B = acetonitrile) is highlighted in pink in the DAD chromatogram at 214nm.

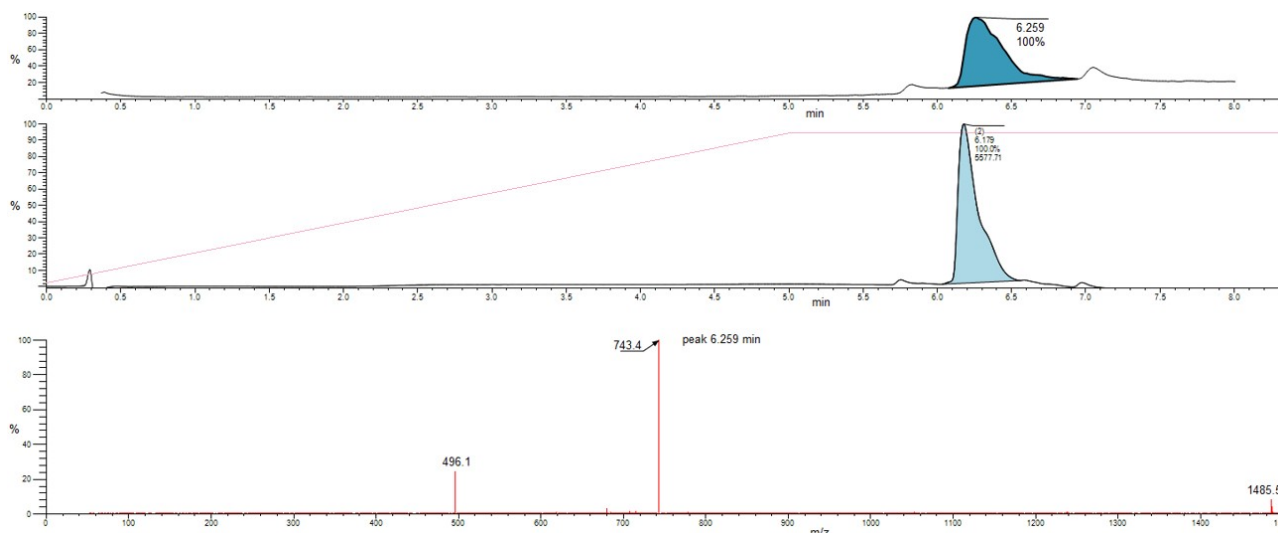

**Figure S11.** Total ion count chromatogram (TIC+) and mass spectral data for compound **PVFRET** after cleavage of the assembled peptide from SPPS resin and HPLC purification. The solvent gradient (%B = acetonitrile) is highlighted in pink in the DAD chromatogram at 214nm.

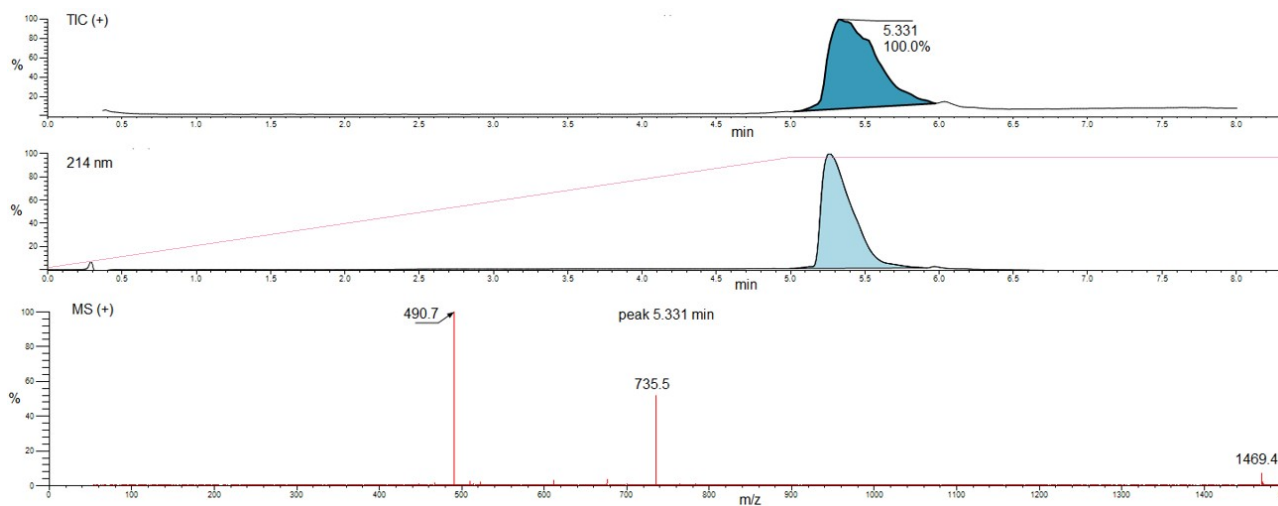

**Figure S12.** Total ion count chromatogram (TIC+) and mass spectral data for compound **EVFRET** after cleavage of the assembled peptide from SPPS resin and HPLC purification. The solvent gradient (%B = acetonitrile) is highlighted in pink in the DAD chromatogram at 214nm.



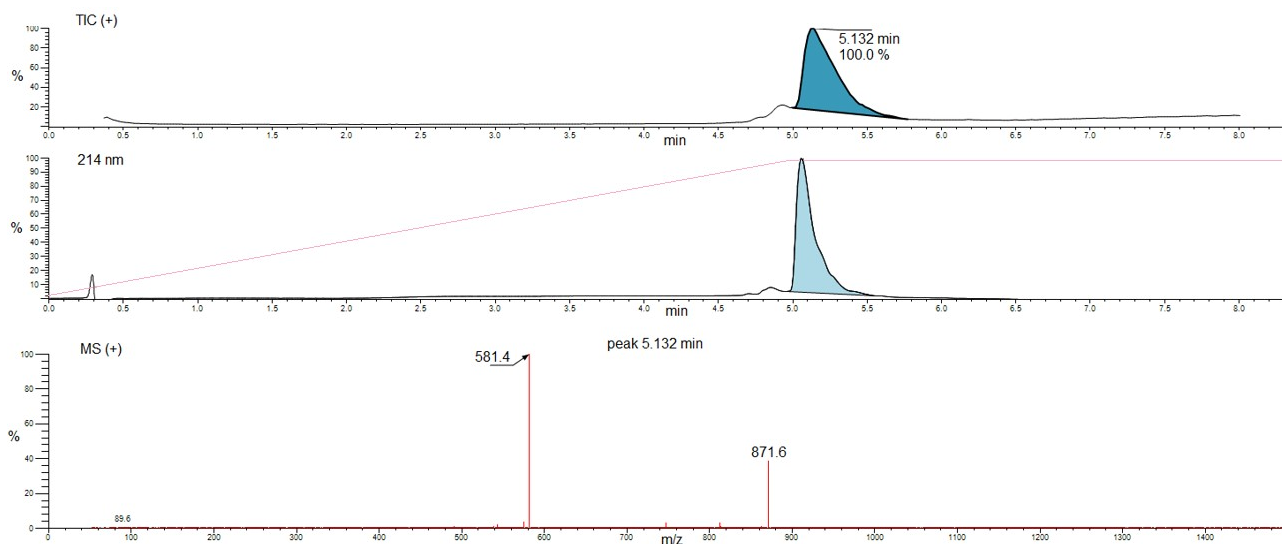

**Figure S13.** Total ion count chromatogram (TIC+) and mass spectral data for compound **NVFRET** after cleavage of the assembled peptide from SPPS resin and HPLC purification. The solvent gradient (%B = acetonitrile) is highlighted in pink in the DAD chromatogram at 214nm.

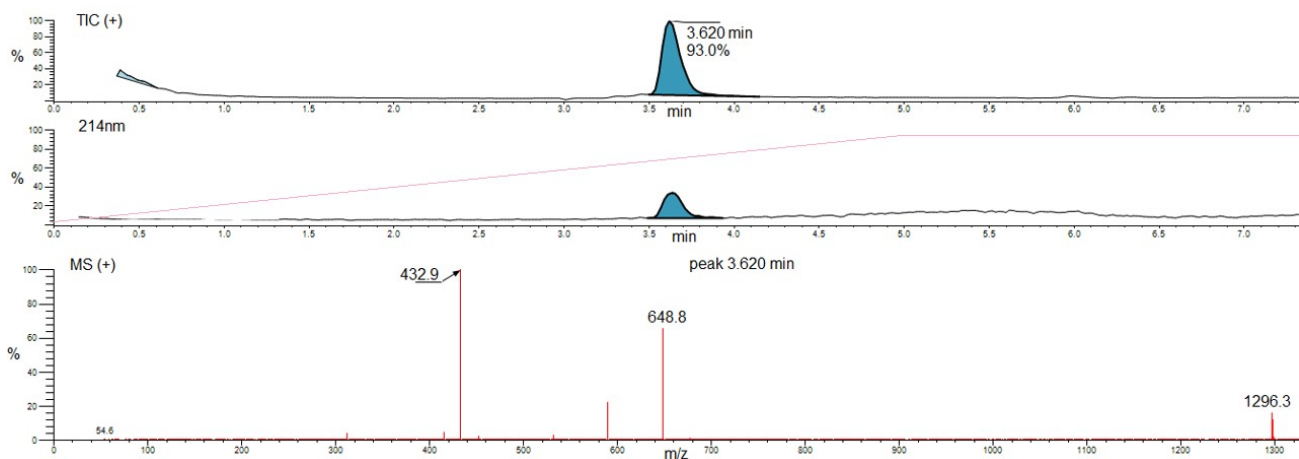

**Figure S14.** Total ion count chromatogram (TIC+) and mass spectral data for compound **NPFRET** after cleavage of the assembled peptide from SPPS resin and HPLC purification. The solvent gradient (%B = acetonitrile) is highlighted in pink in the DAD chromatogram at 214nm.

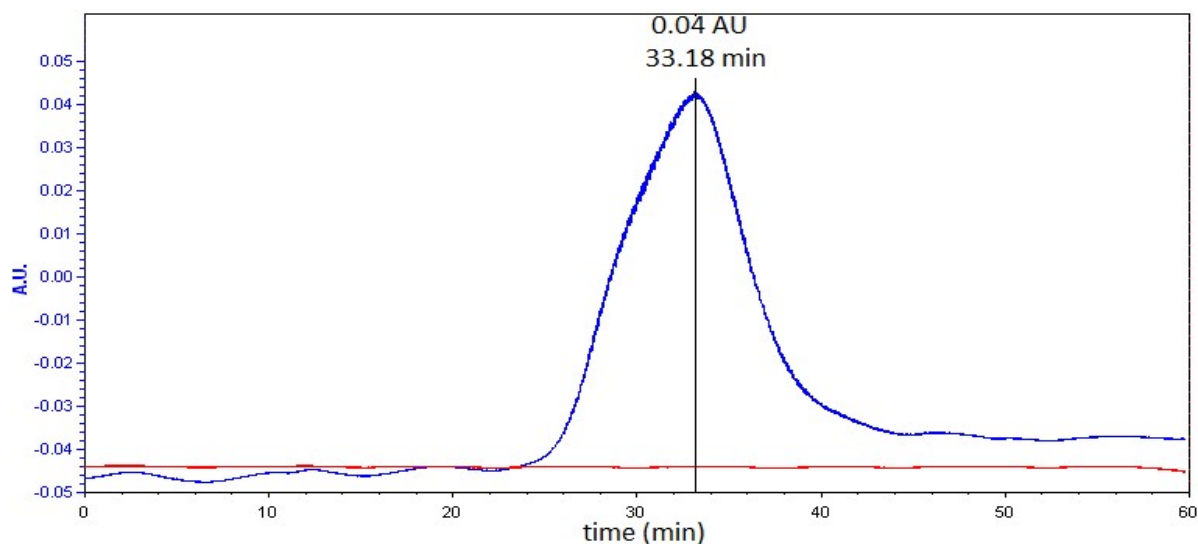

Gel filtration chromatogram (Sephadex G-15, 1 mL/min, 20 mM Bis-Tris, 150 mM NaCl, 1 mM DTT, 1 mM EDTA, pH 7.8, 0.02% Tween) of FIPV-M<sup>Pro</sup>

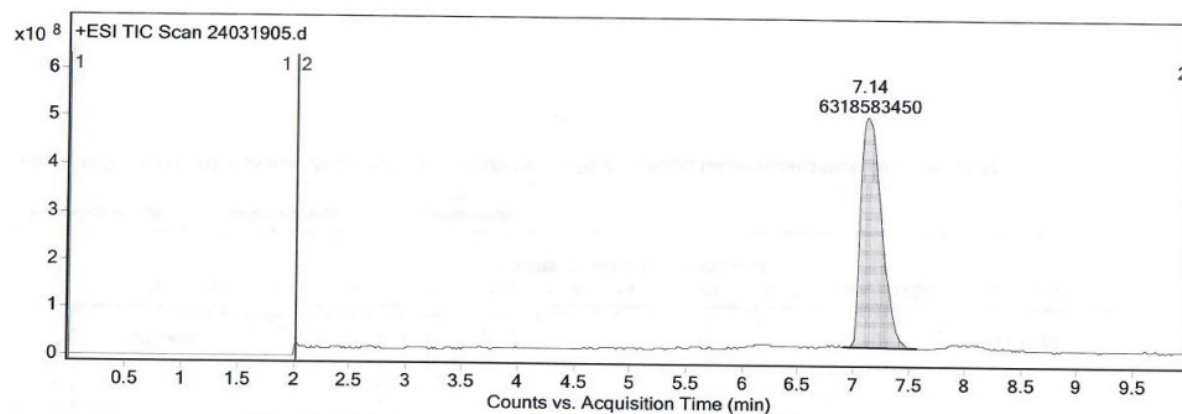

| Integration Peak List |       |      |      |           |            |        |  |
|-----------------------|-------|------|------|-----------|------------|--------|--|
| Peak                  | Start | RT   | End  | Height    | Area       | Area % |  |
| 1                     | 6.91  | 7.14 | 7.58 | 479186990 | 6318583450 | 100    |  |

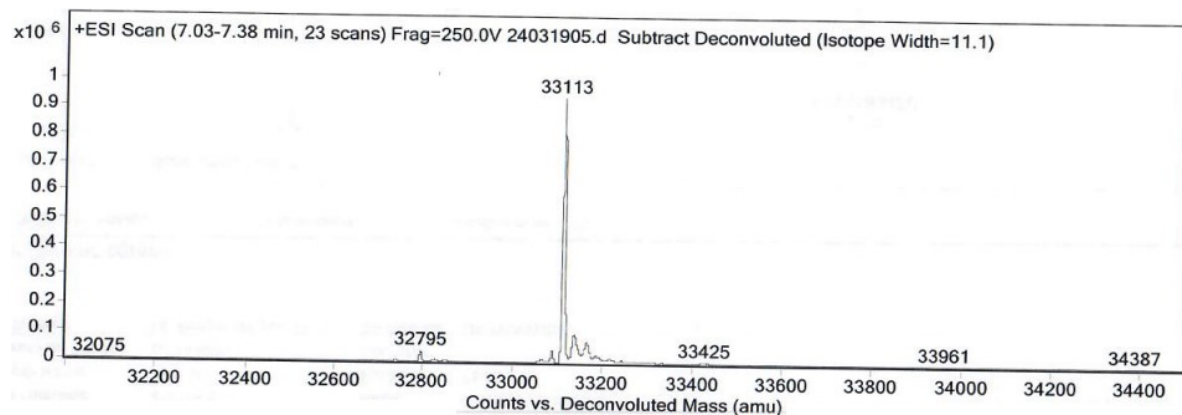

Chromatogram and deconvoluted mass spectrum of FIPV-M<sup>Pro</sup>

**Figure S15.** Chromatographic and ESI mass-spectrometric characterization of FIPV-M<sup>Pro</sup>.

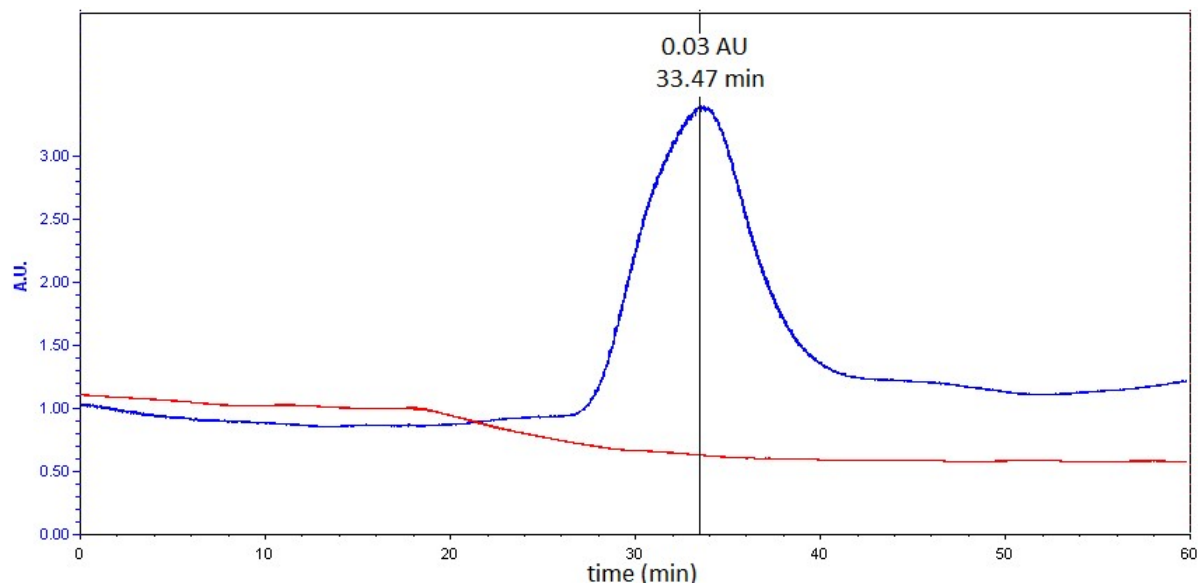

Gel filtration chromatogram (Sephadex G-15, 1 mL/min, 20 mM Bis-Tris, 150 mM NaCl, 1 mM DTT, 1 mM EDTA, pH 7.8, 0.02% Tween) of PEDV-M<sup>pro</sup>.

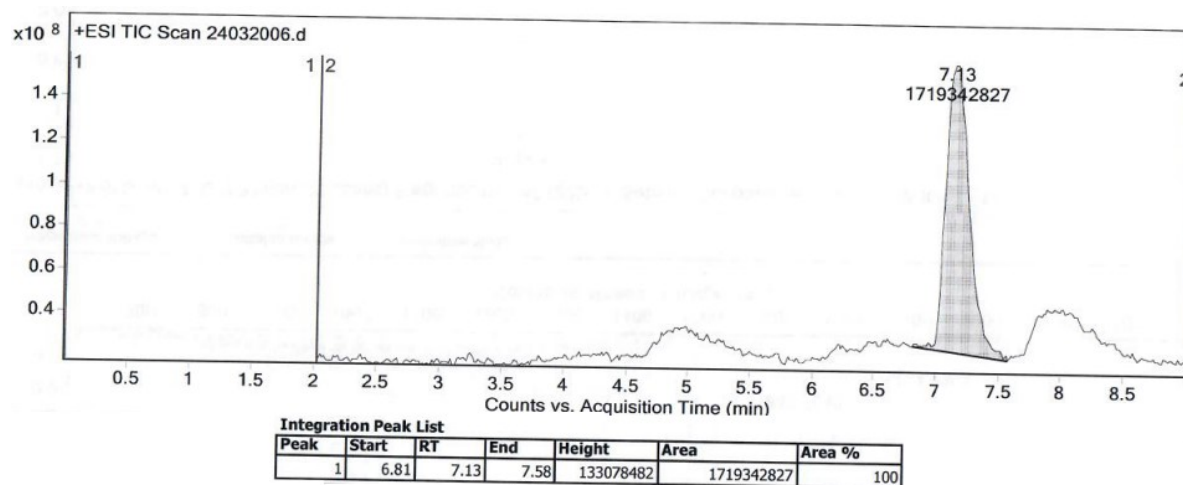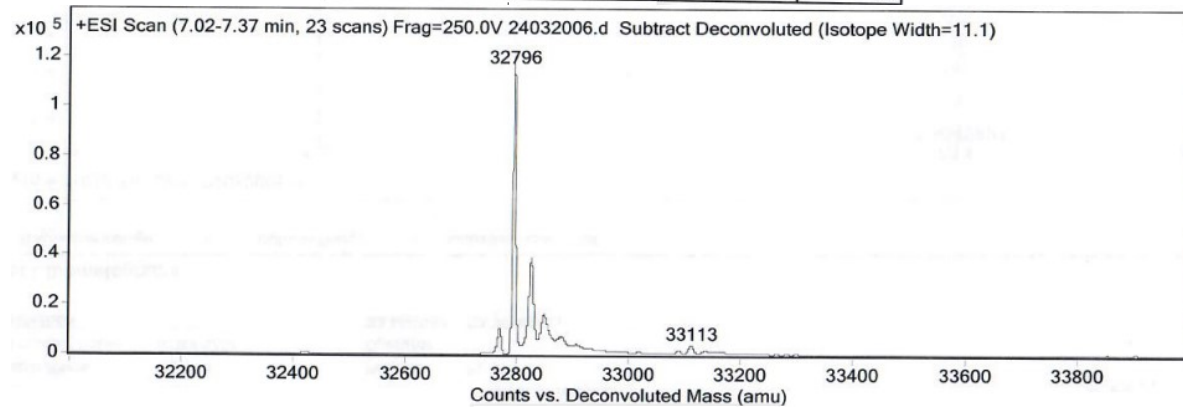

Chromatogram and deconvoluted mass spectrum of PEDV-M<sup>pro</sup>.

**Figure S16.** Chromatographic and ESI mass-spectrometric characterization of PEDV-M<sup>pro</sup>.

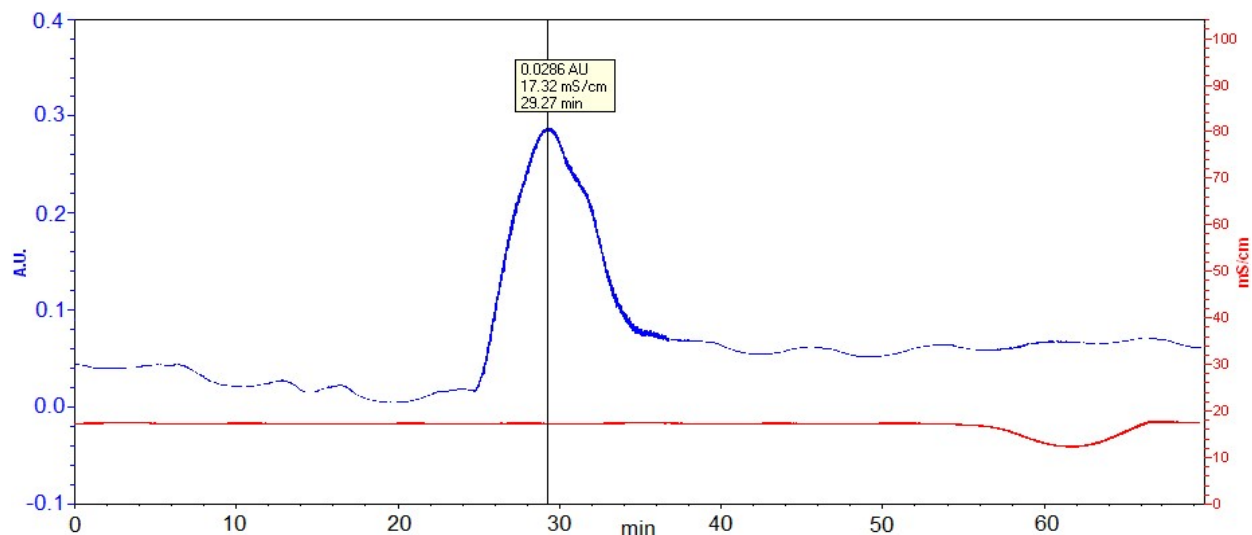

Gel filtration chromatogram (Sephadex G-15, 1 mL/min, 20 mM Bis-Tris, 150 mM NaCl, 1 mM DTT, 1 mM EDTA, pH 7.8, 0.02% Tween) of EqCoV-M<sup>pro</sup>.

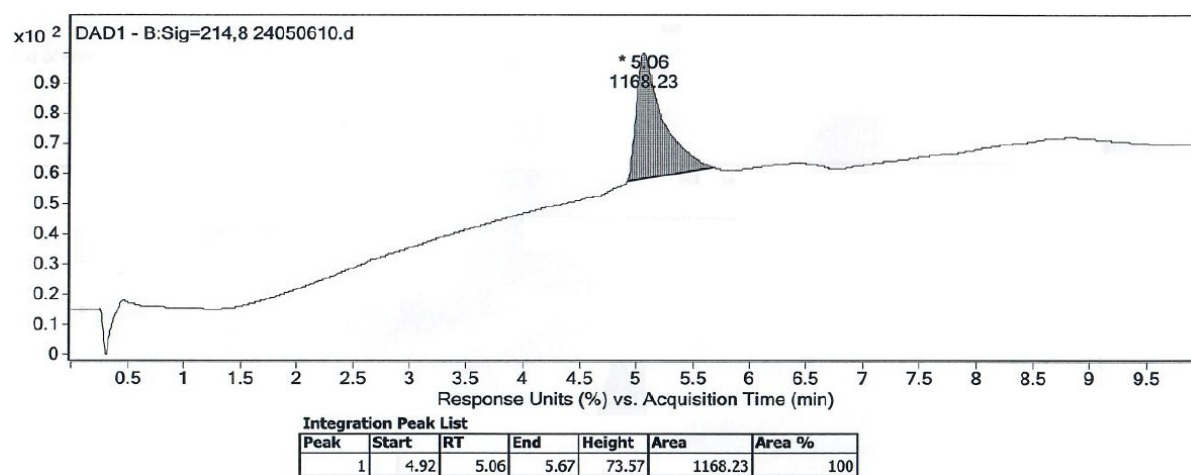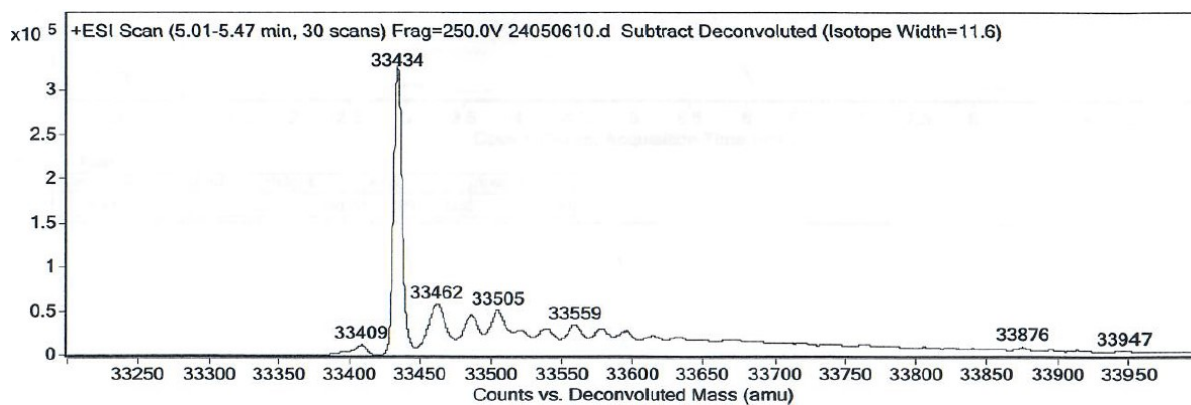

Chromatogram and deconvoluted mass spectrum of EqCoV-M<sup>pro</sup>.

**Figure S17.** Chromatographic and ESI mass-spectrometric characterization of EqCoV-M<sup>pro</sup>.

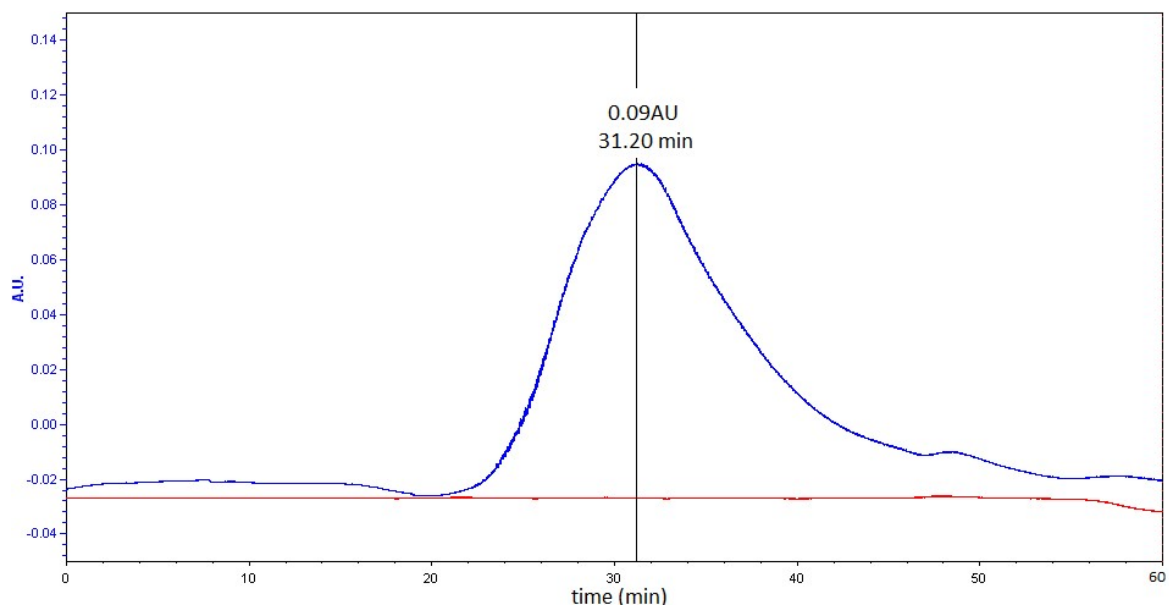

Gel filtration chromatogram (Sephadex G-15, 1 mL/min, 20 mM Bis-Tris, 150 mM NaCl, 1 mM DTT, 1 mM EDTA, pH 7.8, 0.02% Tween) of HRV-M<sup>pro</sup>

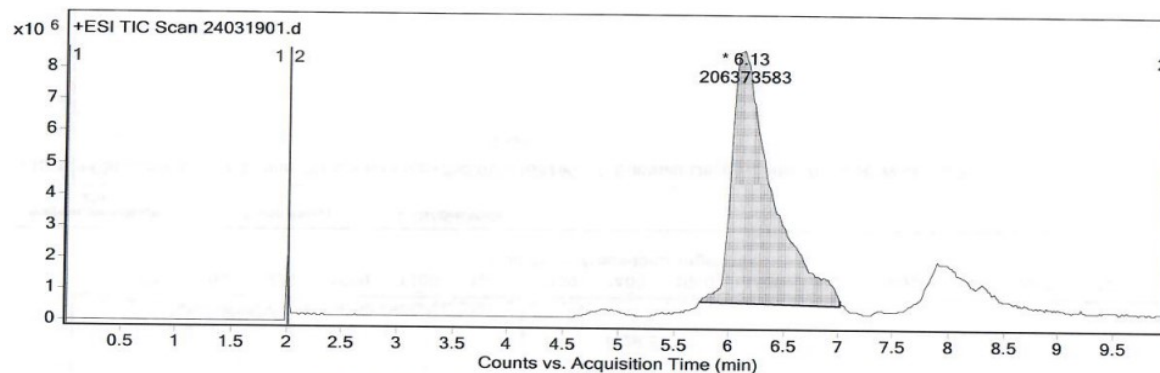

| Peak | Start | RT   | End  | Height  | Area      | Area % |
|------|-------|------|------|---------|-----------|--------|
| 1    | 5.73  | 6.13 | 7.03 | 7992060 | 206373583 | 100    |

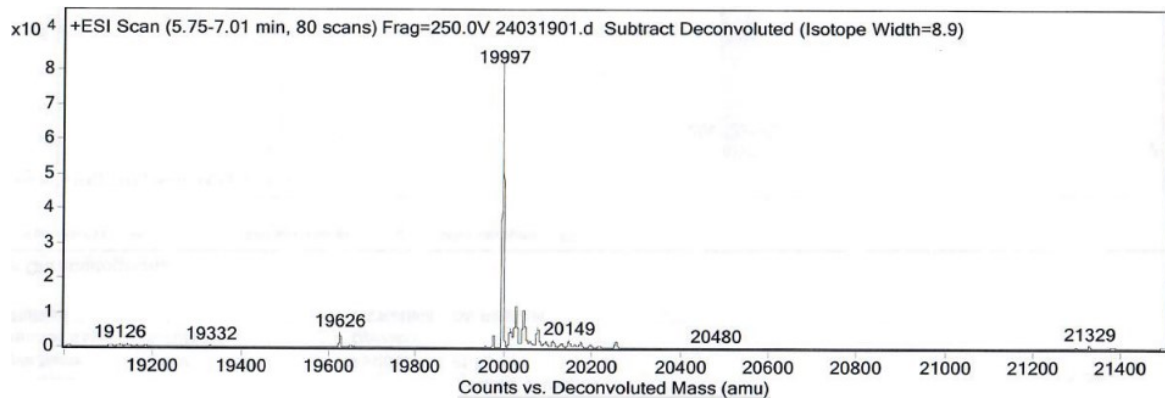

Chromatogram and deconvoluted mass spectrum of HRV-M<sup>pro</sup>

**Figure S18.** Chromatographic and ESI mass-spectrometric characterization of HRV-M<sup>pro</sup>.

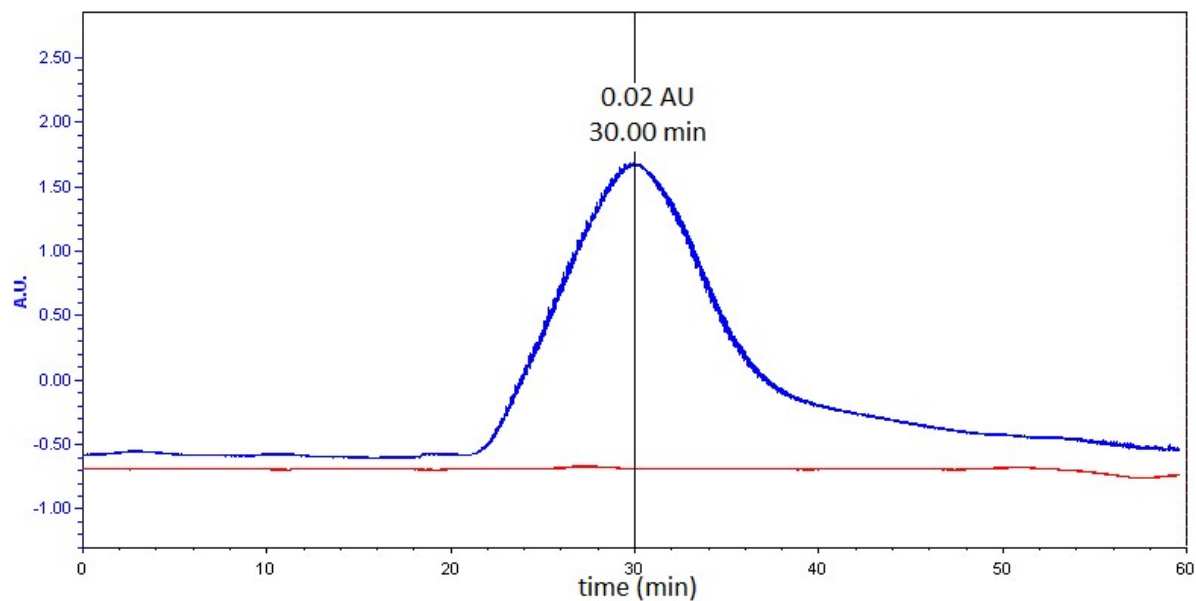

Gel filtration chromatogram (Sephadex G-15, 1 mL/min, 20 mM Bis-Tris, 150 mM NaCl, 1 mM DTT, 1 mM EDTA, pH 7.8, 0.02% Tween) of PV-M<sup>pro</sup>

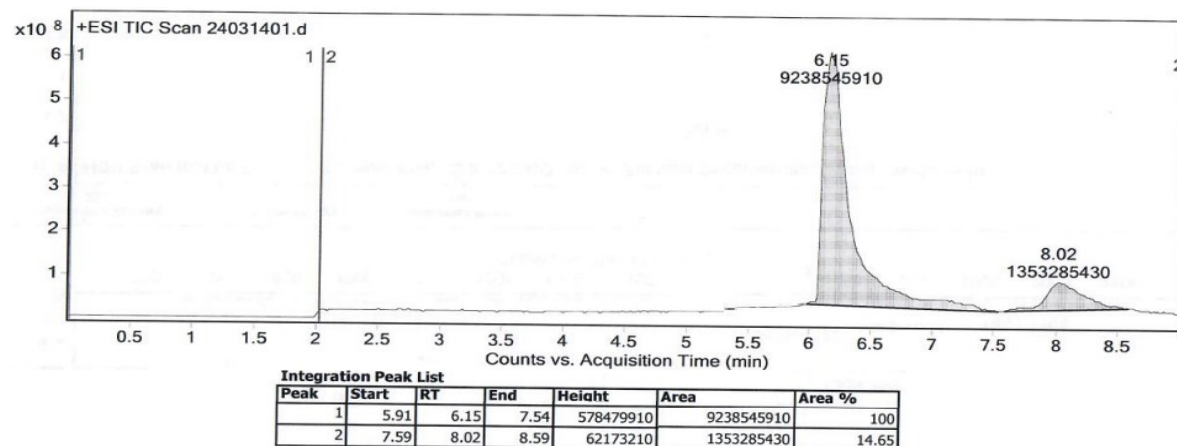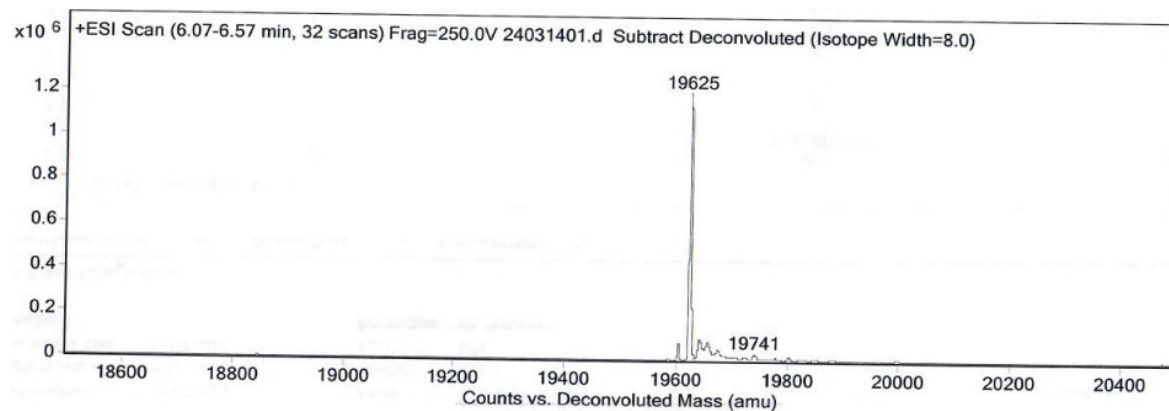

Chromatogram and deconvoluted mass spectrum of PV-M<sup>pro</sup>

**Figure S19.** Chromatographic and ESI mass-spectrometric characterization of PV-M<sup>pro</sup>.

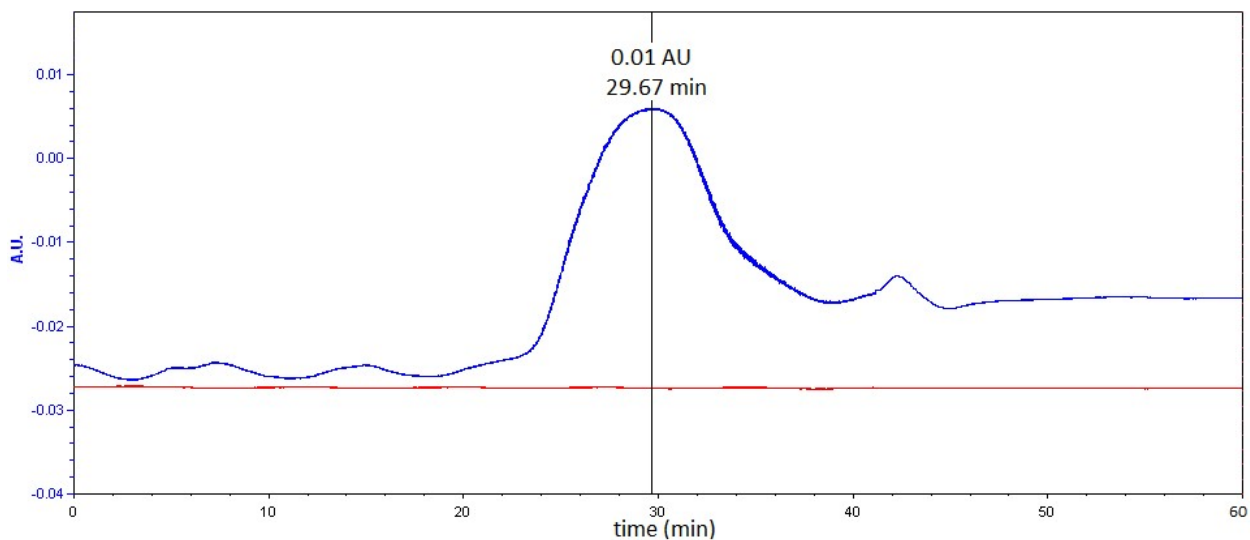

Gel filtration chromatogram (Sephadex G-15, 1 mL/min, 20 mM Bis-Tris, 150 mM NaCl, 1 mM DTT, 1 mM EDTA, pH 7.8, 0.02% Tween) of EV71-M<sup>pro</sup>

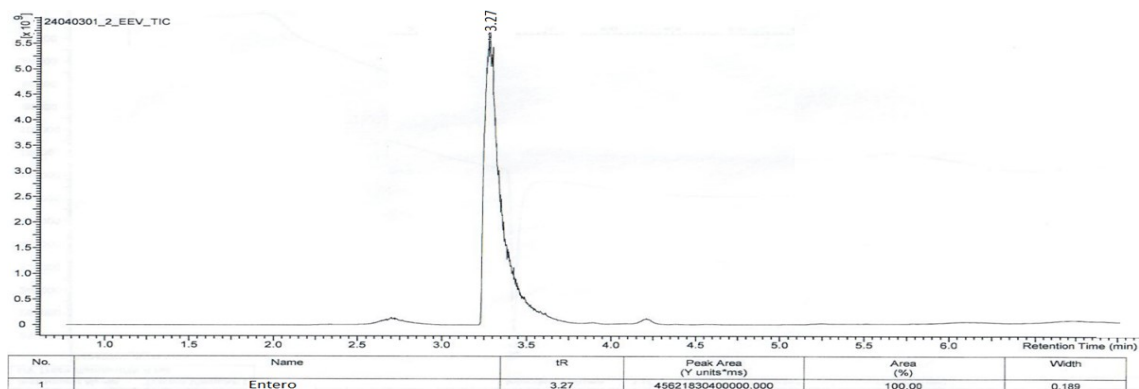

|                  |                       |               |                                                              |             |                                           |
|------------------|-----------------------|---------------|--------------------------------------------------------------|-------------|-------------------------------------------|
| Sample           | EEV                   | File Name     | 24040301_2_EEV_Combined_3-31_554_002_ChargeStateDeconvoluted |             |                                           |
| Instrument Model | Orbitrap Exploris 240 | Ion Mode      | ESI+                                                         | Scan        | 554                                       |
| Scan Type        | Full                  | Spectrum Type | MS                                                           | Scan Filter | FTMS + p ESI Full ms [300.0000-3000.0000] |

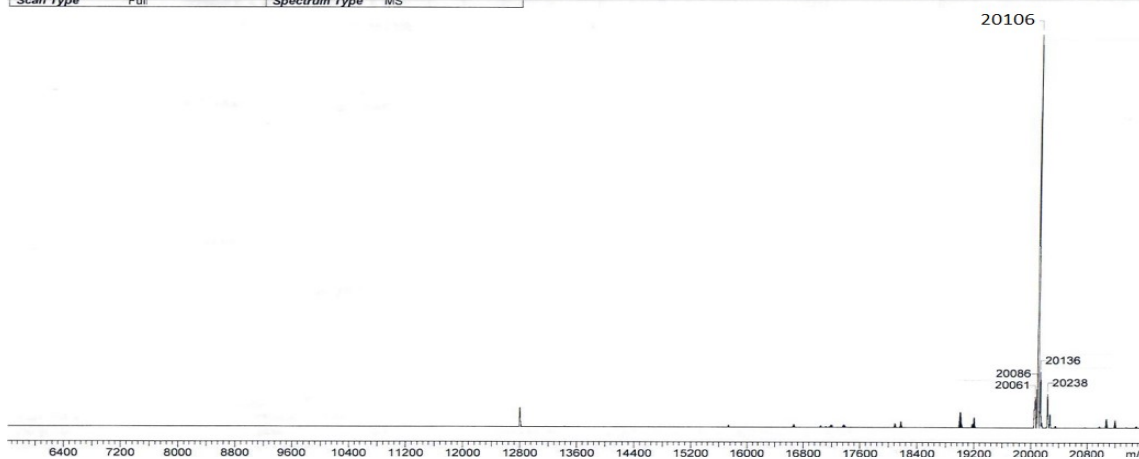

Chromatogram and deconvoluted mass spectrum of EV71-M<sup>pro</sup>

**Figure S20.** Chromatographic and ESI mass-spectrometric characterization of EV71-M<sup>pro</sup>.

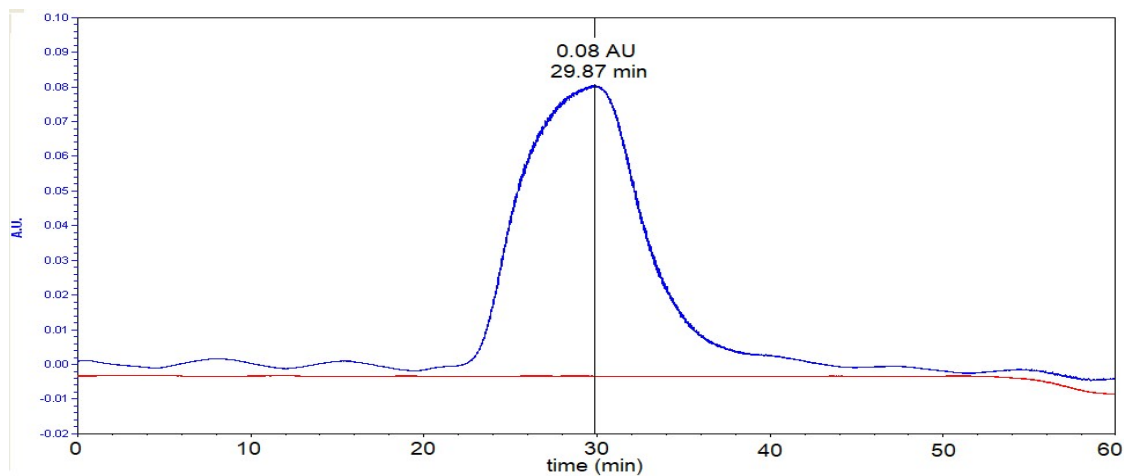

Gel filtration chromatogram (Sephadex G-15, 1 mL/min, 20 mM Bis-Tris, 150 mM NaCl, 1 mM DTT, 1 mM EDTA, pH 7.8, 0.02% Tween) of NV-M<sup>pro</sup>

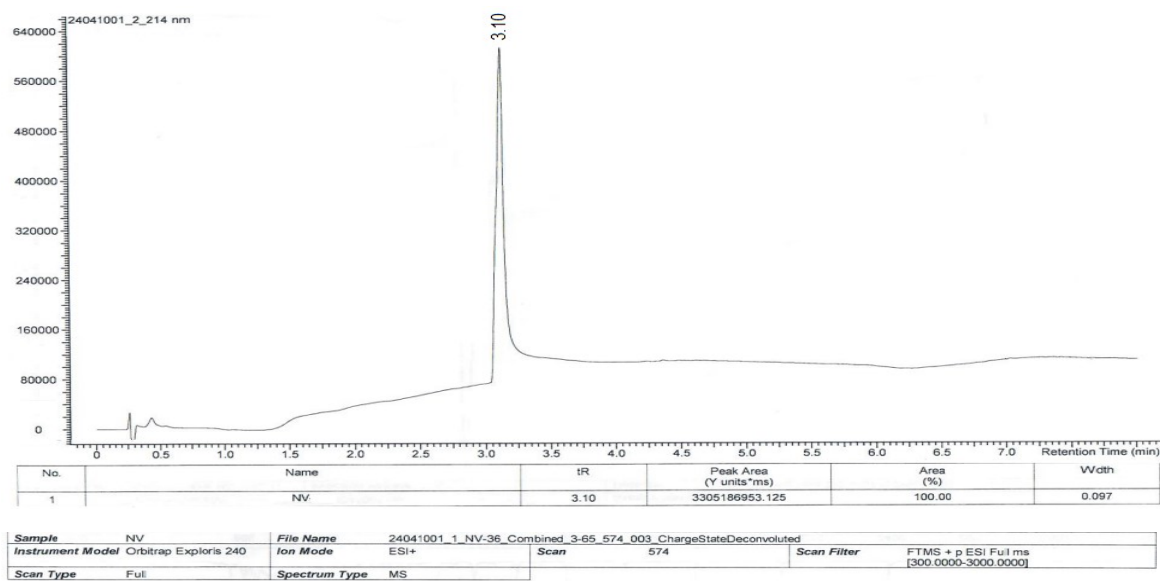

Chromatogram and deconvoluted mass spectrum of NV-M<sup>pro</sup>

**Figure S21.** Chromatographic and ESI mass-spectrometric characterization of NV-M<sup>pro</sup>.



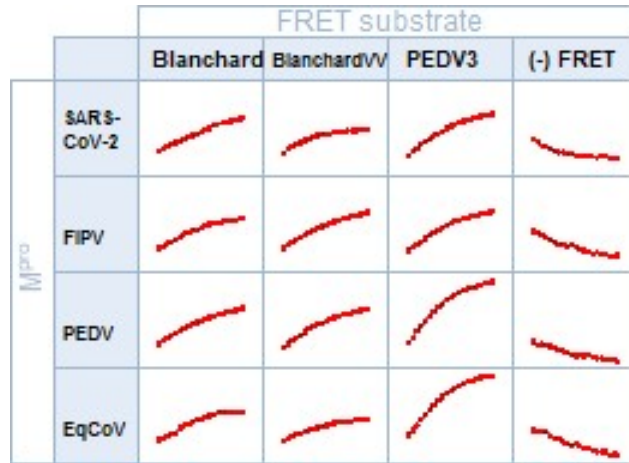

**Figure S22.** Reaction progression curves of various M<sup>pro</sup>s with selected FRET substrates. The curves depict fluorescence released over the course of a 10 min assay.

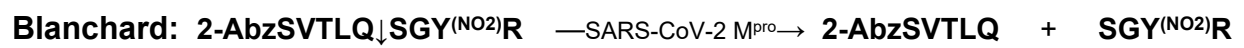

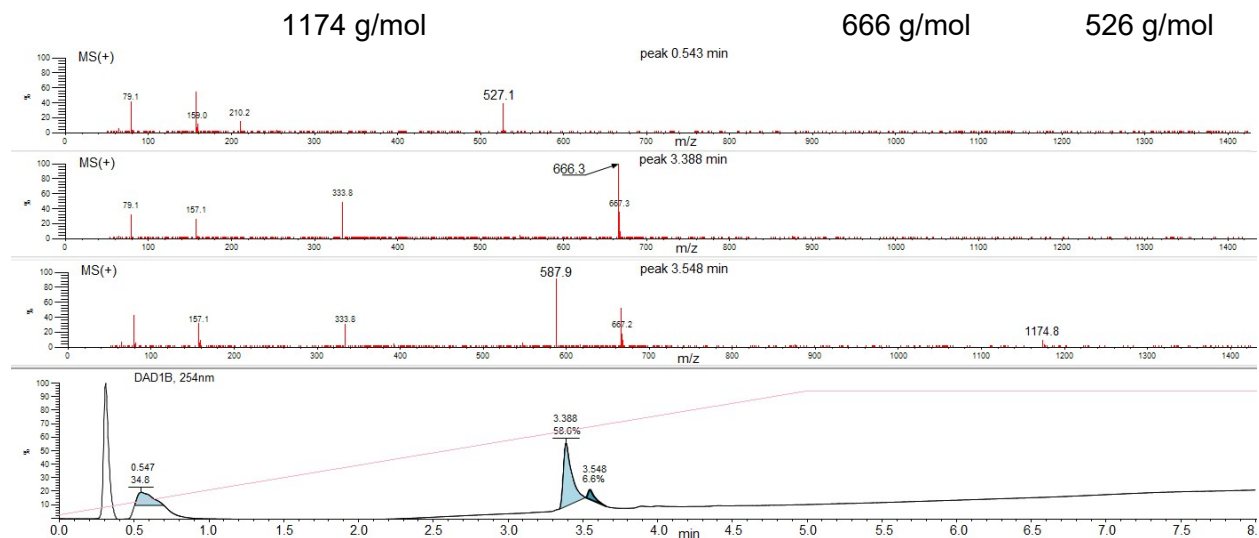

**PEDV3: 2-AbzSTLQ↓SGY<sup>(NO2)</sup>R** —SARS-CoV-2 M<sup>pro</sup>→ **2-AbzSTLQ** + **SGY<sup>(NO2)</sup>R**  
 1075 g/mol                      566 g/mol                      526 g/mol

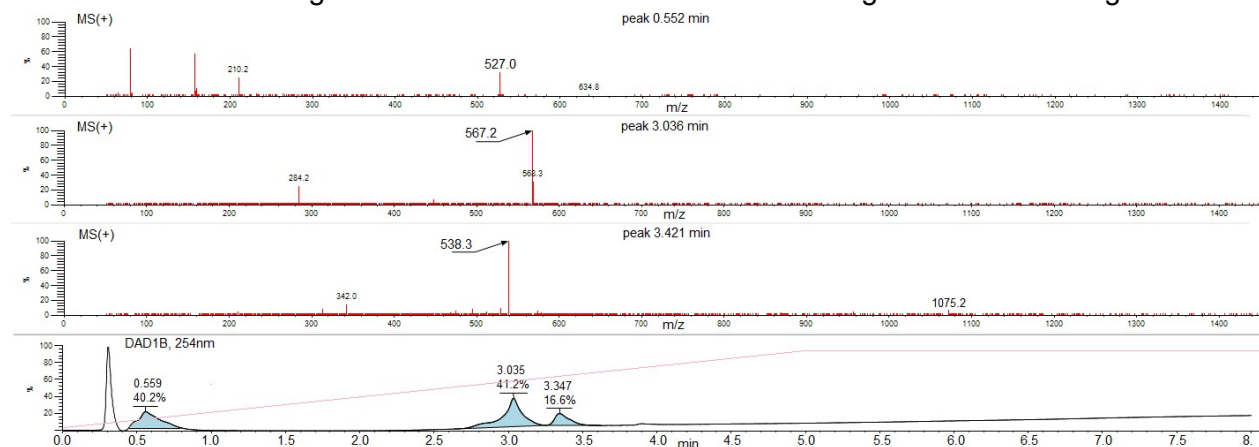

**(-) FRET: 2-AbzSTLAAGY<sup>(NO2)</sup>R** —SARS-CoV-2 M<sup>pro</sup>→ no cleavage  
 1002 g/mol

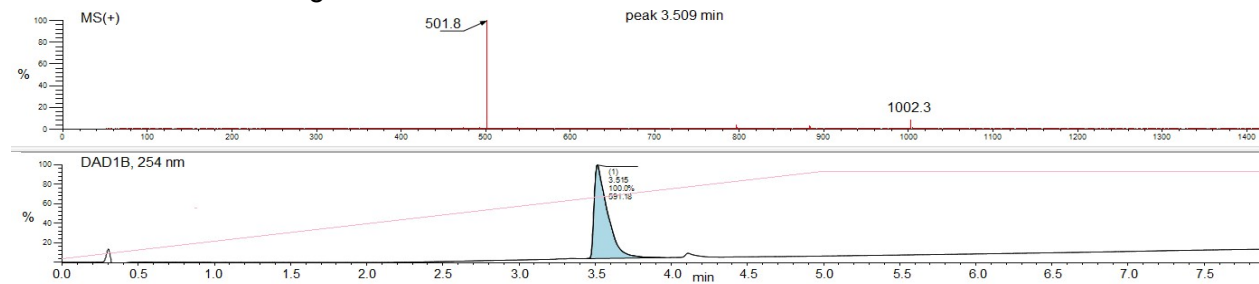

**Figure S23.** LCMS analysis of cleavage products formed by reaction of Blanchard FRET (top) and PEDV3 FRET (middle) and negative control (-)FRET, bottom) with SARS-CoV-2 M<sup>pro</sup> after 10 min cleavage highlighting cleavage specificity of the main protease.

### Michaelis-Menten plot SARS-CoV-2 M<sup>pro</sup>

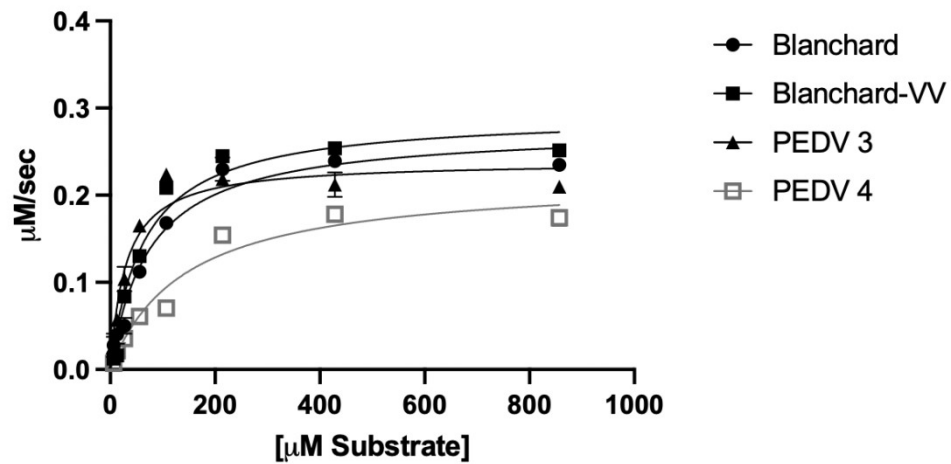

|                                  | Blanchard         | Blanchard-VV      | PEDV 3            | PEDV 4            |
|----------------------------------|-------------------|-------------------|-------------------|-------------------|
| $v_{max}$ , $\mu\text{M s}^{-1}$ | $0.2763 \pm 0.02$ | $0.2927 \pm 0.02$ | $0.2386 \pm 0.04$ | $0.2201 \pm 0.03$ |
| $K_M$ , $\mu\text{M}$            | $82 \pm 14$       | $64 \pm 10$       | $30 \pm 8$        | $142 \pm 18$      |
| Goodness of fit                  |                   |                   |                   |                   |
| R squared                        | 0.9664            | 0.9619            | 0.9321            | 0.9545            |

**Figure S24.** Michaelis-Menten plot of various coronavirus FRETs with SARS-CoV-2 M<sup>pro</sup>.

### Michaelis-Menten plot FIPV M<sup>pro</sup>

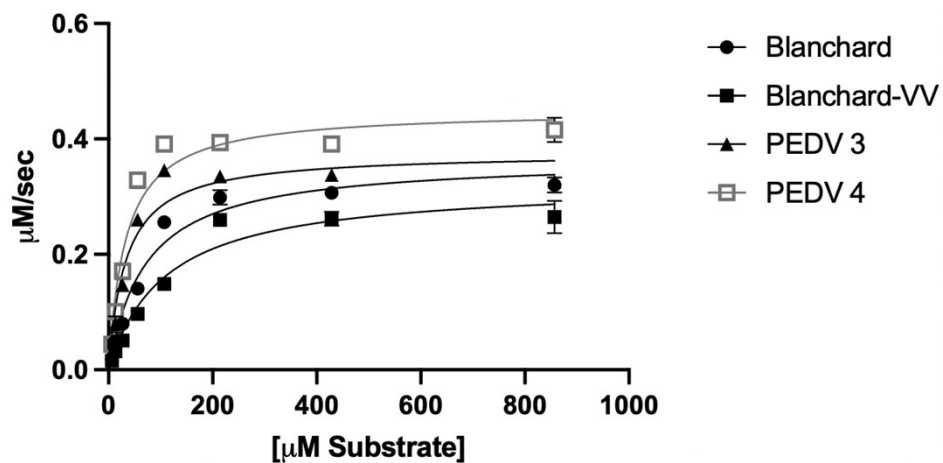

|                                  | Blanchard         | Blanchard-VV      | PEDV 3            | PEDV 4            |
|----------------------------------|-------------------|-------------------|-------------------|-------------------|
| $v_{max}$ , $\mu\text{M s}^{-1}$ | $0.3661 \pm 0.03$ | $0.3231 \pm 0.04$ | $0.3762 \pm 0.04$ | $0.4199 \pm 0.04$ |
| $K_M$ , $\mu\text{M}$            | $72 \pm 12$       | $85 \pm 15$       | $33.1 \pm 12$     | $32.9 \pm 11$     |
| Goodness of fit                  |                   |                   |                   |                   |
| R squared                        | 0.9675            | 0.9556            | 0.9322            | 0.9471            |

**Figure S25.** Michaelis-Menten plot of various coronavirus FRETs with FIPV M<sup>pro</sup>.

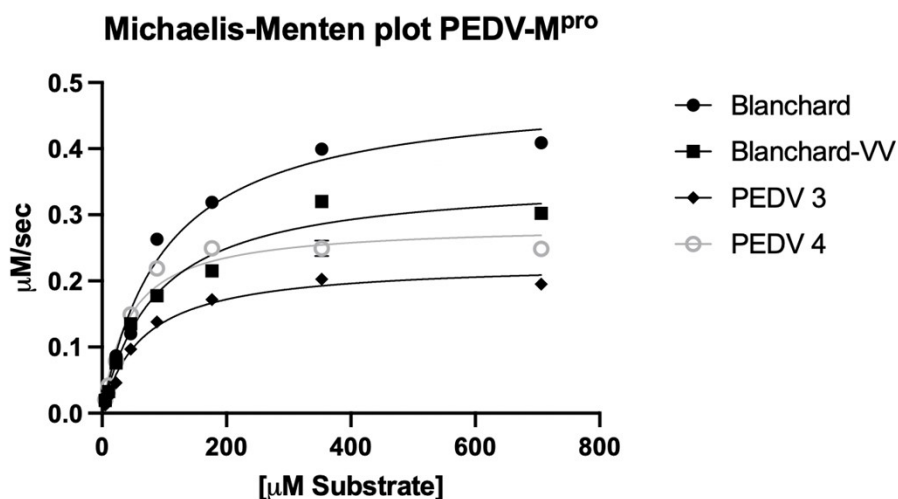

|                                  | Blanchard        | Blanchard-VV     | PEDV 3           | PEDV 4           |
|----------------------------------|------------------|------------------|------------------|------------------|
| $v_{max}$ , $\mu\text{M s}^{-1}$ | $0.489 \pm 0.03$ | $0.360 \pm 0.04$ | $0.269 \pm 0.03$ | $0.228 \pm 0.01$ |
| $K_M$ , $\mu\text{M}$            | $100 \pm 18$     | $85 \pm 10$      | $38 \pm 11$      | $65 \pm 12$      |
| Goodness of fit                  |                  |                  |                  |                  |
| R squared                        | 0.9817           | 0.9801           | 0.9713           | 0.9892           |

**Figure S26.** Michaelis-Menten plot of various coronavirus FRETs with PEDV M<sup>pro</sup>.

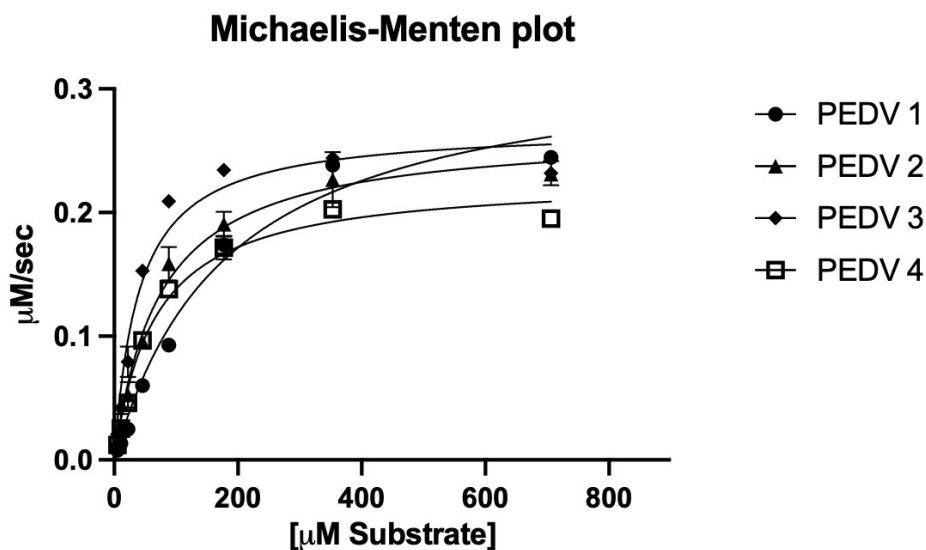

|                                  | PEDV 1           | PEDV 2           | PEDV 3           | PEDV 4           |
|----------------------------------|------------------|------------------|------------------|------------------|
| $v_{max}$ , $\mu\text{M s}^{-1}$ | $0.330 \pm 0.02$ | $0.266 \pm 0.02$ | $0.269 \pm 0.03$ | $0.248 \pm 0.01$ |
| $K_M$ , $\mu\text{M}$            | $192 \pm 26$     | $63 \pm 11$      | $38 \pm 11$      | $65 \pm 12$      |
| Goodness of fit                  |                  |                  |                  |                  |
| R squared                        | 0.9852           | 0.9819           | 0.9713           | 0.9892           |

**Figure S27.** Michaelis-Menten plot of various PEDV FRETs with PEDV M<sup>pro</sup>.

**Michaelis-Menten plot EqCoV M<sup>pro</sup>**

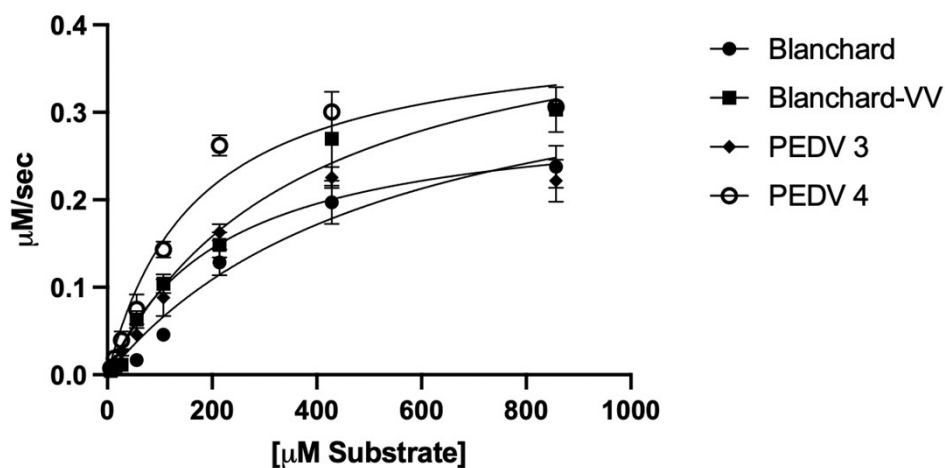

|                               | PEDV 1 | PEDV 2 | PEDV 3 | PEDV 4 |
|-------------------------------|--------|--------|--------|--------|
| $v_{max}, \mu\text{M s}^{-1}$ | 0.4075 | 0.4516 | 0.3027 | 0.3963 |
| $K_M, \mu\text{M}$            | 549.1  | 371.1  | 219.1  | 168.5  |
| Goodness of fit               |        |        |        |        |
| R squared                     | 0.9632 | 0.9630 | 0.9623 | 0.9664 |

**Figure S28.** Michaelis-Menten plot of various coronavirus FRETs with EqCoV M<sup>pro</sup>.

**Michaelis-Menten plot HRV M<sup>pro</sup>**

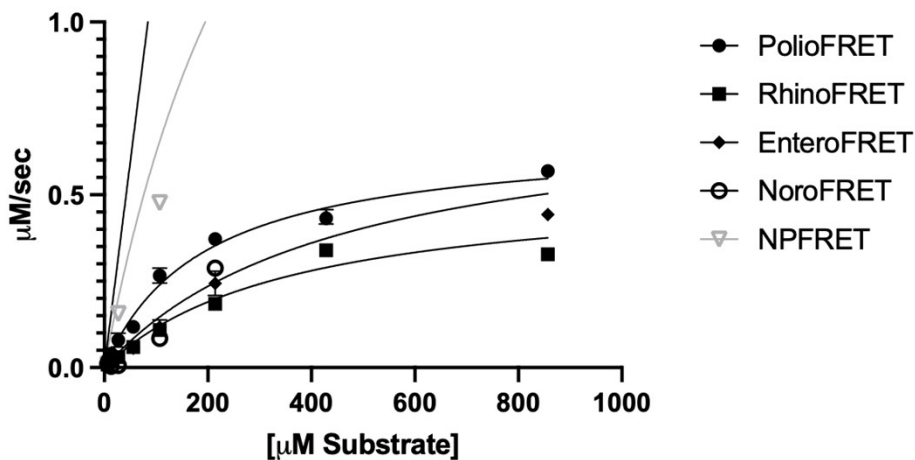

|                               | PVFRET      | HRVFRET     | EVFRET      | NVFRET | NPFRET  |
|-------------------------------|-------------|-------------|-------------|--------|---------|
| $v_{max}, \mu\text{M s}^{-1}$ | 0.6694±0.06 | 0.5348±0.08 | 0.7709±0.08 | n.d.*  | n.d.*   |
| $K_M, \mu\text{M}$            | 192.1±35    | 363.0±83    | 455.3±112   | n.d.*  | n.d.*   |
| Goodness of fit               |             |             |             |        |         |
| R squared                     | 0.9836      | 0.9593      | 0.9554      | 0.8414 | 0.07005 |

**Figure S29.** Michaelis-Menten plot of various picornavirus FRETs with HRV M<sup>pro</sup>. No exact data for entries with (\*) could be determined due lack of convergence.

**Michaelis-Menten plot Polio M<sup>pro</sup>**

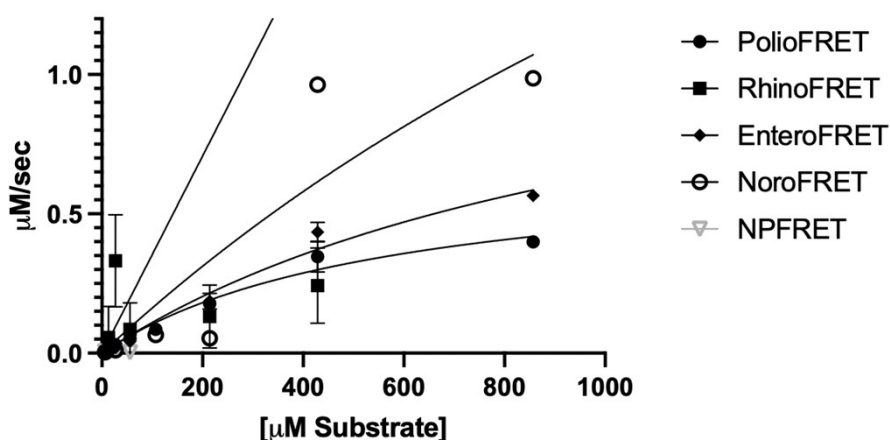

|                               | PVFRET      | HRVFRET | EVFRET     | NVFRET     | NPFRET |
|-------------------------------|-------------|---------|------------|------------|--------|
| $v_{max}, \mu\text{M s}^{-1}$ | 0.6969±0.06 | n.d.*   | 1.366±0.30 | 4.136±1.36 | n.d.*  |
| $K_M, \mu\text{M}$            | 569.3±95    | n.d.*   | 1143±205   | 2452±830   | 1386   |
| Goodness of fit               |             |         |            |            |        |
| R squared                     | 0.9693      | 0.7278  | 0.9756     | 0.8315     | 0.7265 |

**Figure S30.** Michaelis-Menten plot of various picornavirus FRETs with PV M<sup>pro</sup>. No exact data for entries with (\*) could be determined due lack of convergence.

**Michaelis-Menten plot Entero M<sup>pro</sup>**

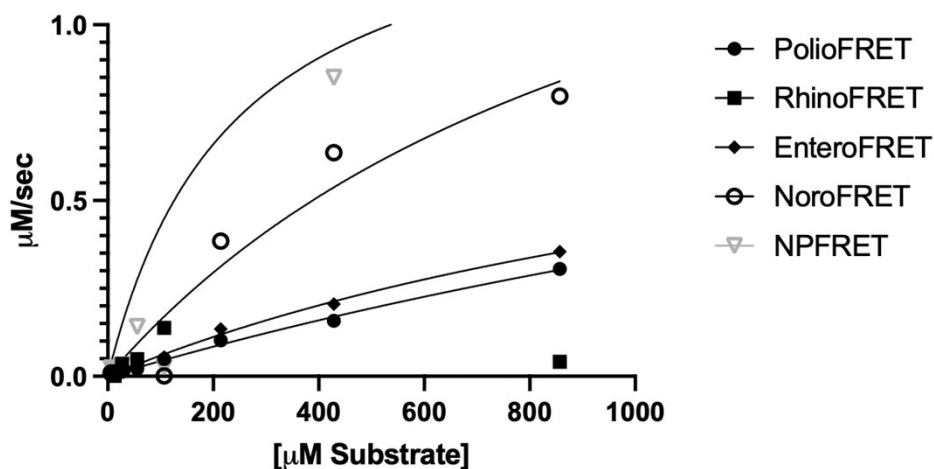

|                               | PVFRET     | HRVFRET | EVFRET     | NVFRET     | NPFRET  |
|-------------------------------|------------|---------|------------|------------|---------|
| $v_{max}, \mu\text{M s}^{-1}$ | 1.442±0.21 | n.d.*   | 1.029±0.13 | 1.914±0.29 | n.d.*   |
| $K_M, \mu\text{M}$            | 3223       | 237.1   | 1641       | 1097       | n.d.*   |
| Goodness of fit               |            |         |            |            |         |
| R squared                     | 0.9956     | 0.2027  | 0.9957     | 0.9246     | 0.04465 |

**Figure S31.** Michaelis-Menten plot of various picornavirus FRETs with EV71 M<sup>pro</sup>. No exact data for entries with (\*) could be determined due lack of convergence.

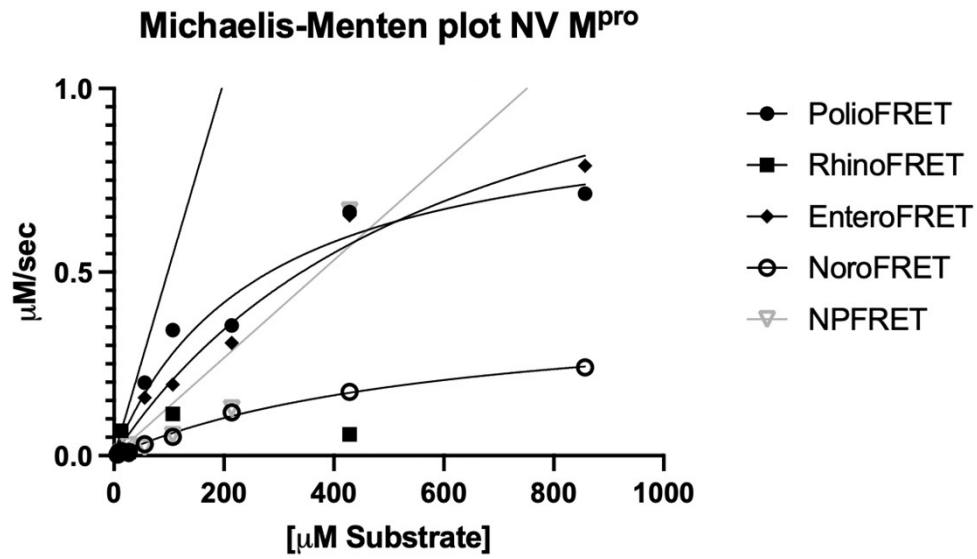

|                                  | PVFRET            | HRVFRET | EVFRET           | NVFRET            | NPFRET |
|----------------------------------|-------------------|---------|------------------|-------------------|--------|
| $v_{max}$ , $\mu\text{M s}^{-1}$ | $0.9659 \pm 0.10$ | n.d.*   | $1.410 \pm 0.16$ | $0.4163 \pm 0.08$ | n.d.*  |
| $K_M$ , $\mu\text{M}$            | 263.5             | n.d.*   | 621.5            | 613.0             | n.d.*  |
| Goodness of fit                  |                   |         |                  |                   |        |
| R squared                        | 0.9565            | 0.7016  | 0.9735           | 0.9945            | 0.9643 |

**Figure S32.** Michaelis-Menten plot of various picornavirus FRETs with NV M<sup>pro</sup>. No exact data for entries with (\*) could be determined due lack of convergence.

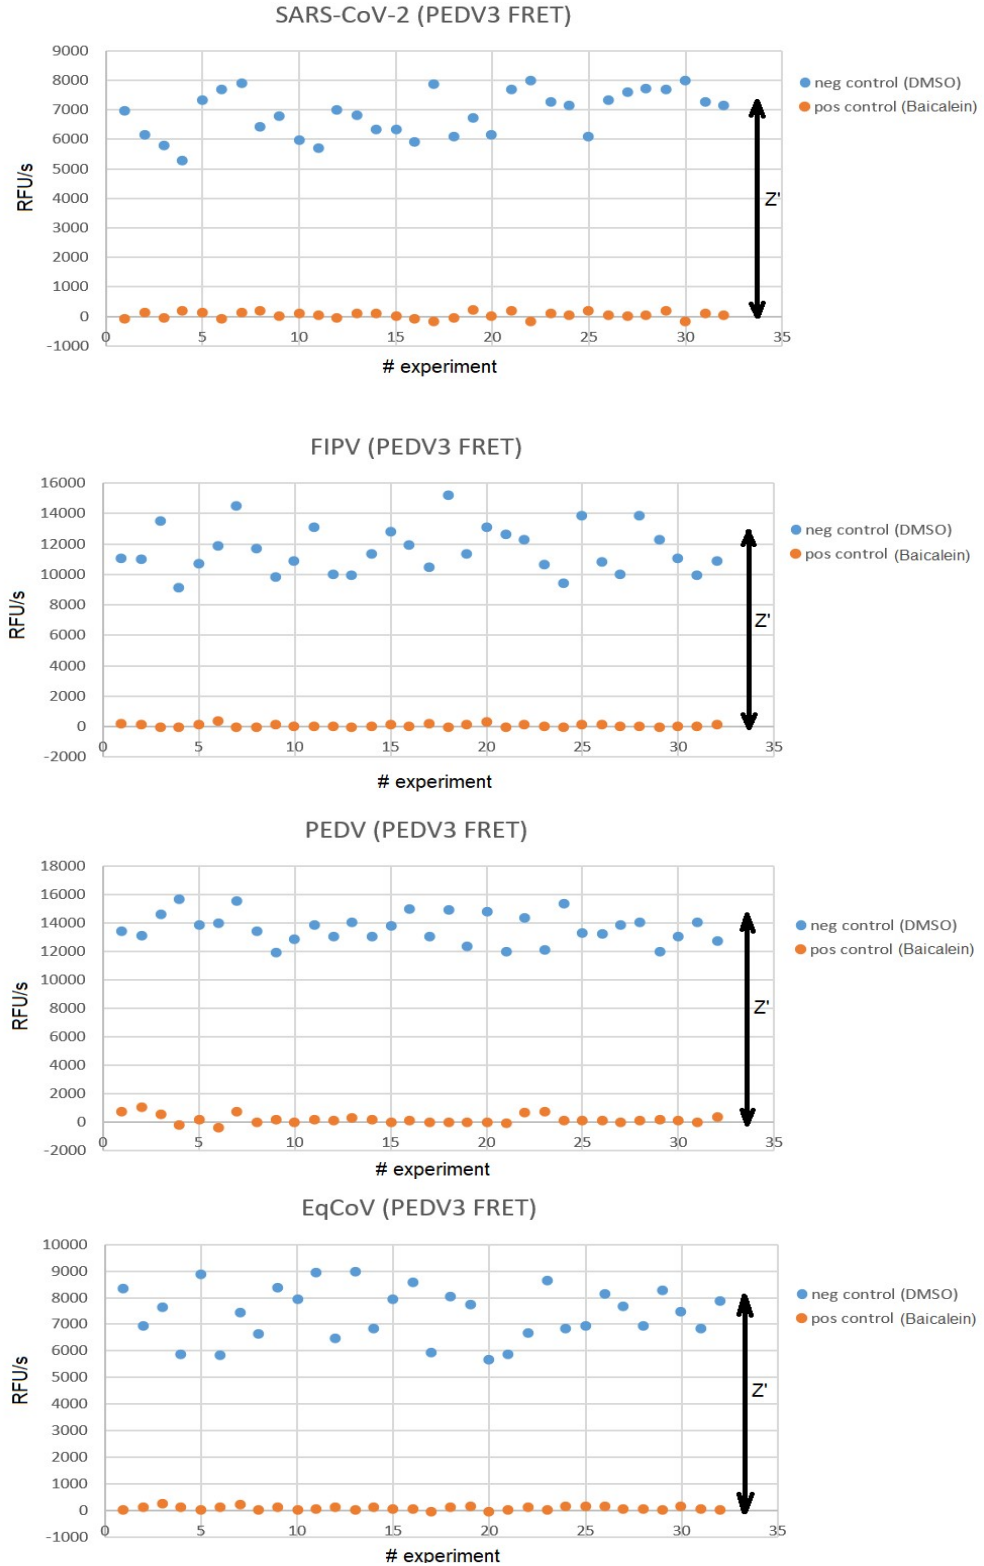

**Figure S33.** Z' assay quality statistics for different coronavirus M<sup>PRO</sup>s (100 nM) with PEDV 3 FRET substrate (10  $\mu$ M). Samples were prepared with 50  $\mu$ M baicalein (positive control) or 50  $\mu$ M DMSO (negative control) and repeated in duplicate for  $n=32$ .
